# Supplementary material for: Synthesis, characterization and applicability of three isotope labeled azobenzene photoswitches
Source: Royal Society of Chemistry journal article supplement (doi:10.1039/b804568b), 2008-01-01

## *Supporting Information*

# **Synthesis, characterization and applicability of three isotope labeled azobenzene photoswitches**

Rolf Pfister,<sup>a</sup> Janne Ihalainen,<sup>a</sup> Peter Hamm<sup>\*a</sup> and Christoph Kolano<sup>\*a</sup>

<sup>a</sup> *Physikalisch-Chemisches Institut, Universität Zürich, Winterthurerstrasse 190,  
CH-8057 Zürich, Switzerland. Fax: +41 4463 56838;  
E-mail: [p Hamm@pci.unizh.ch](mailto:p Hamm@pci.unizh.ch), [c.kolano@pci.unizh.ch](mailto:c.kolano@pci.unizh.ch)*

### **Table of contents**

|                                                                                                   |      |
|---------------------------------------------------------------------------------------------------|------|
| NMR spectra ( <sup>1</sup> H and/or <sup>13</sup> C) for all compounds reported in the manuscript | 2-21 |
|---------------------------------------------------------------------------------------------------|------|

## Compound 1

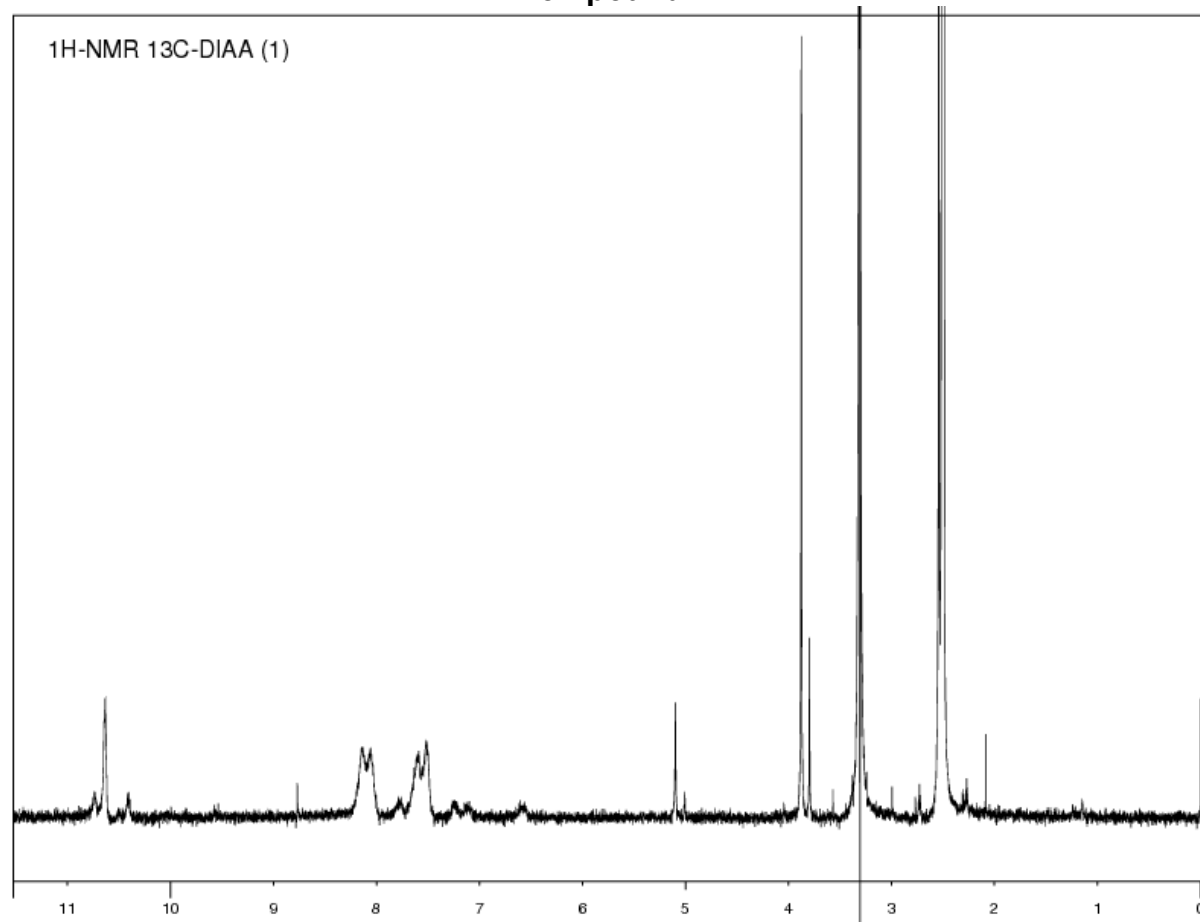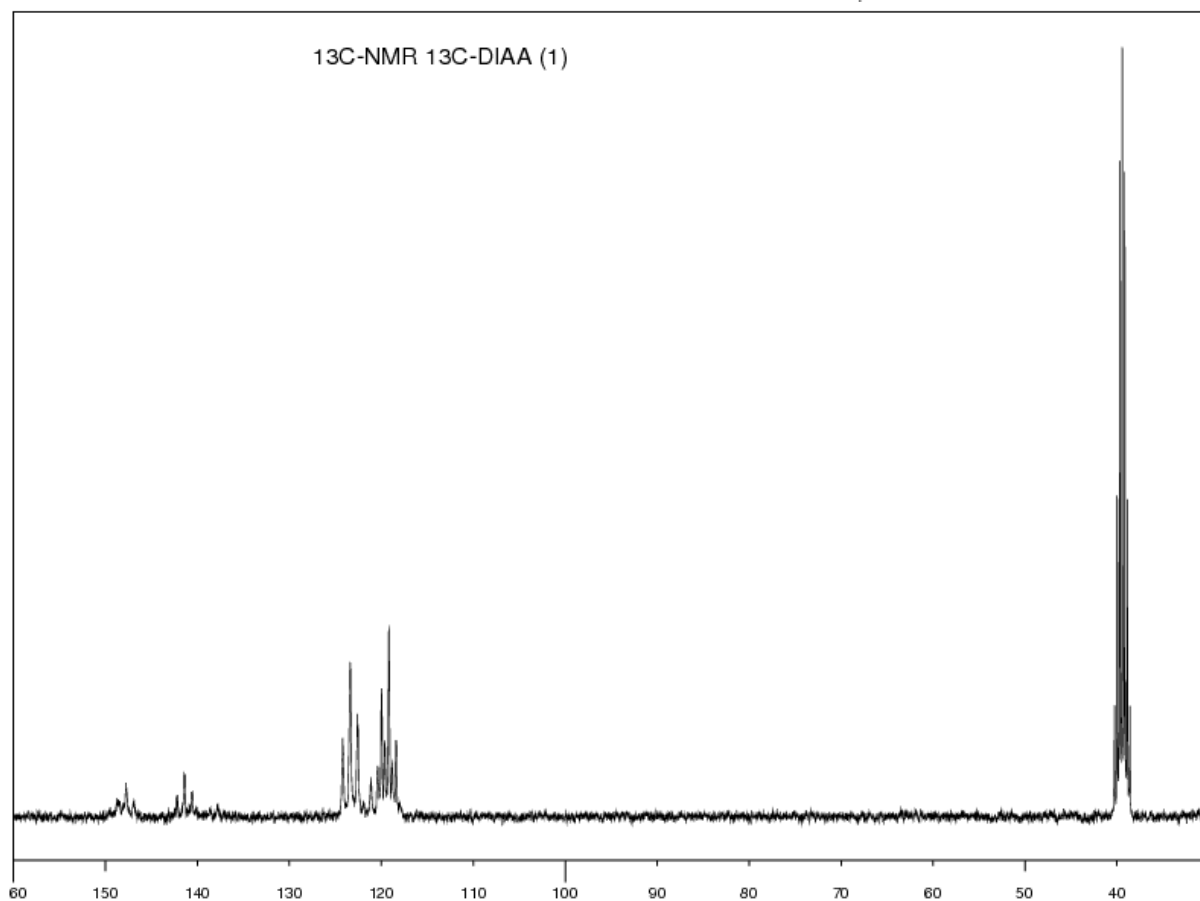

## Compound 2

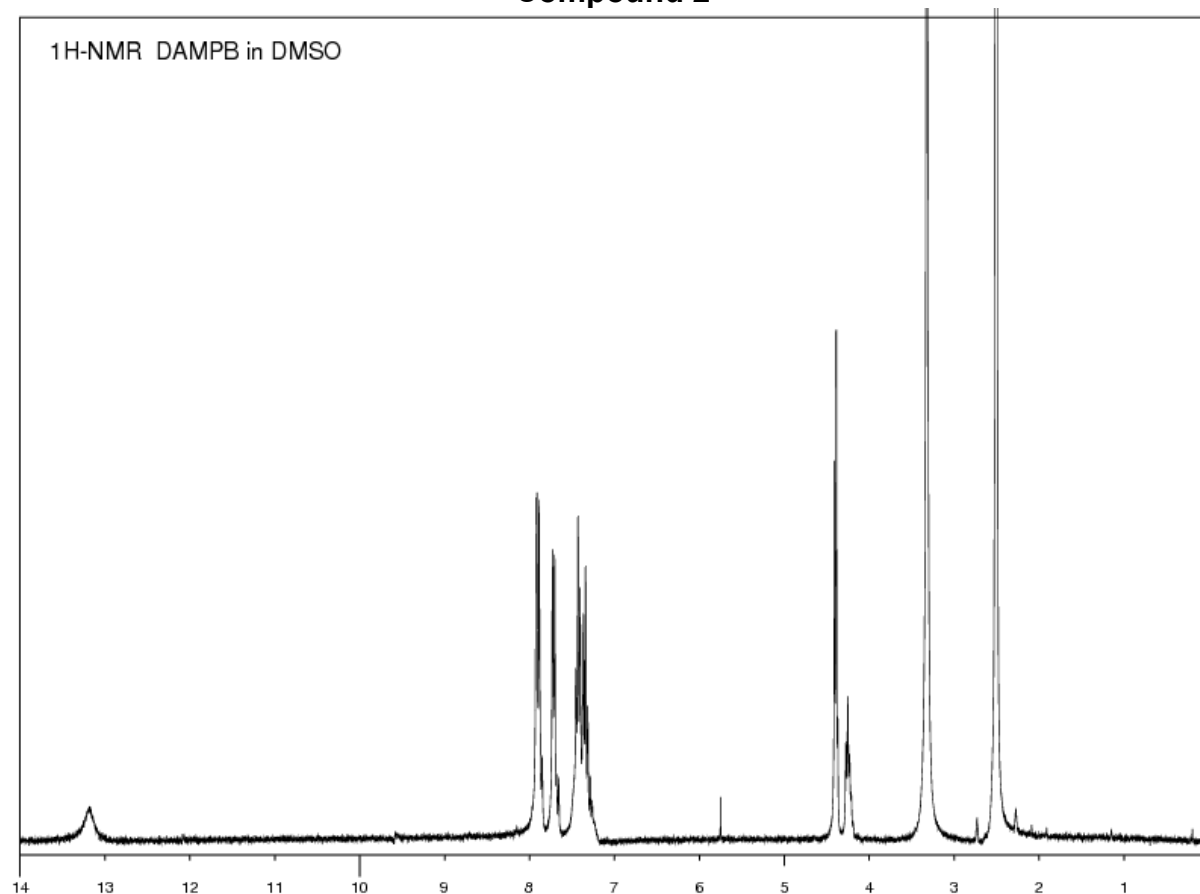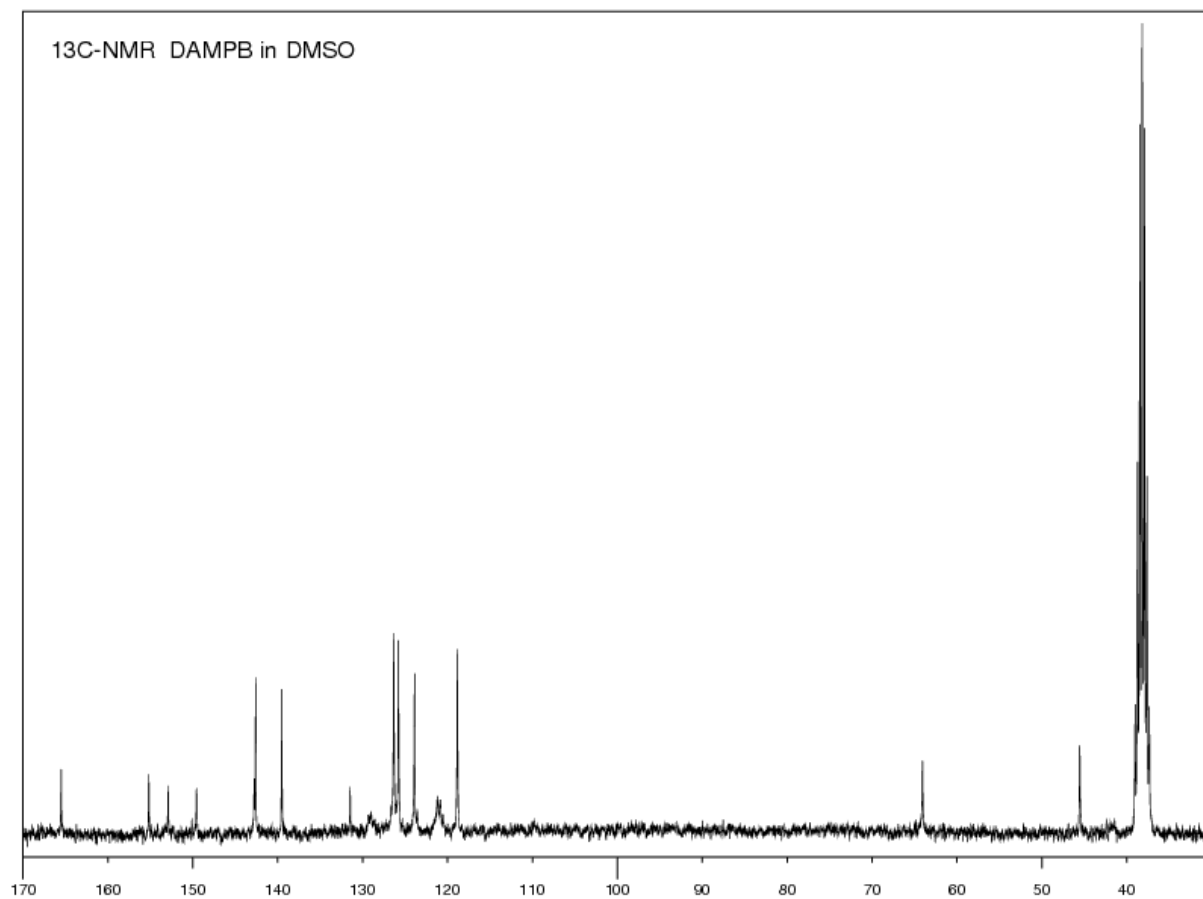

### Compound 3

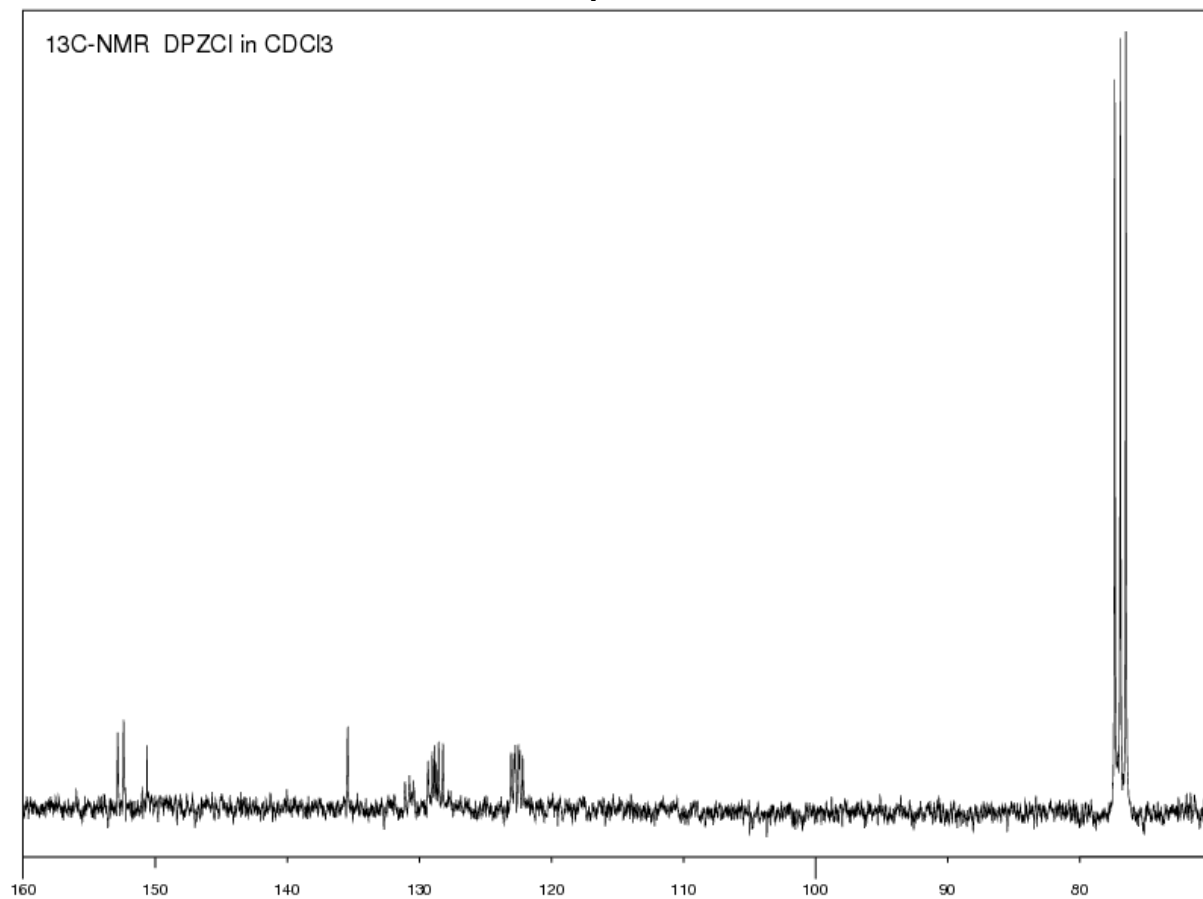

### Compound 3a

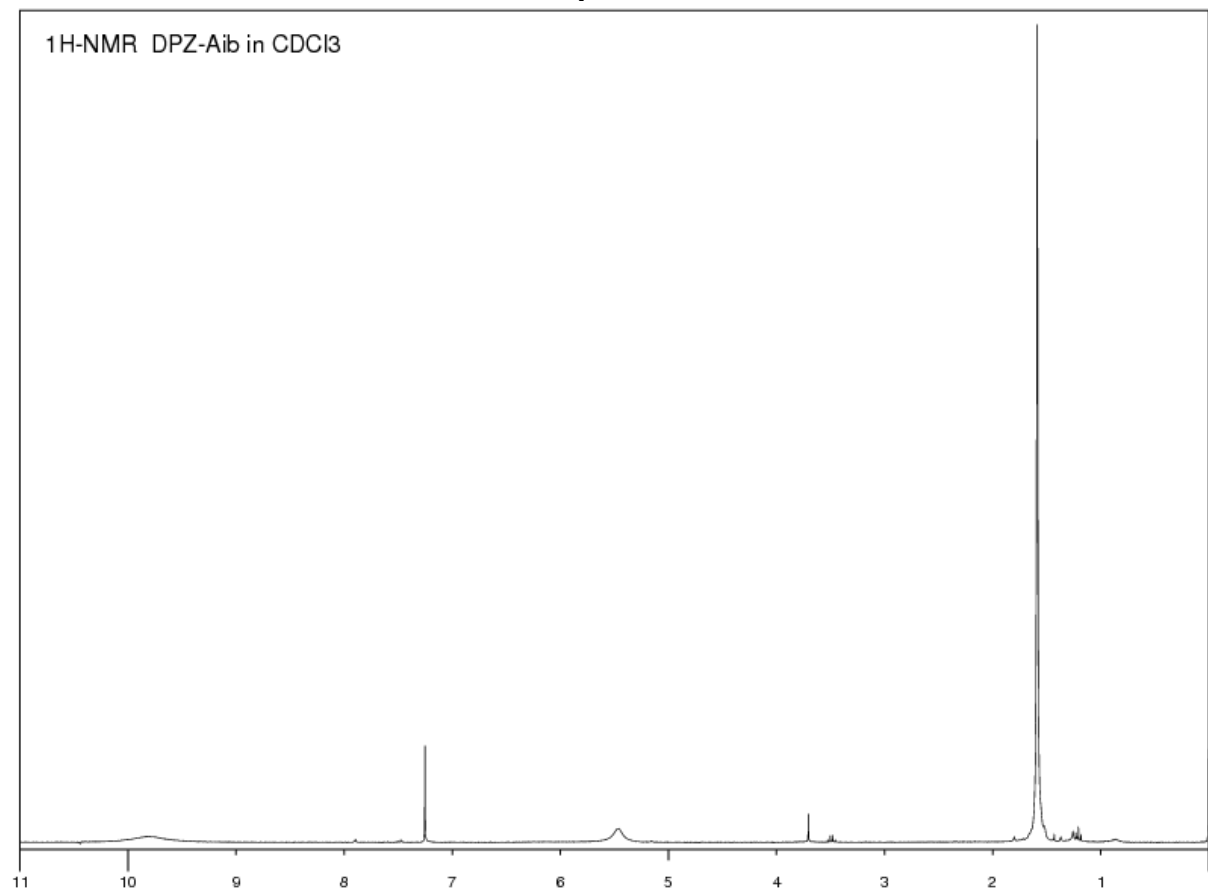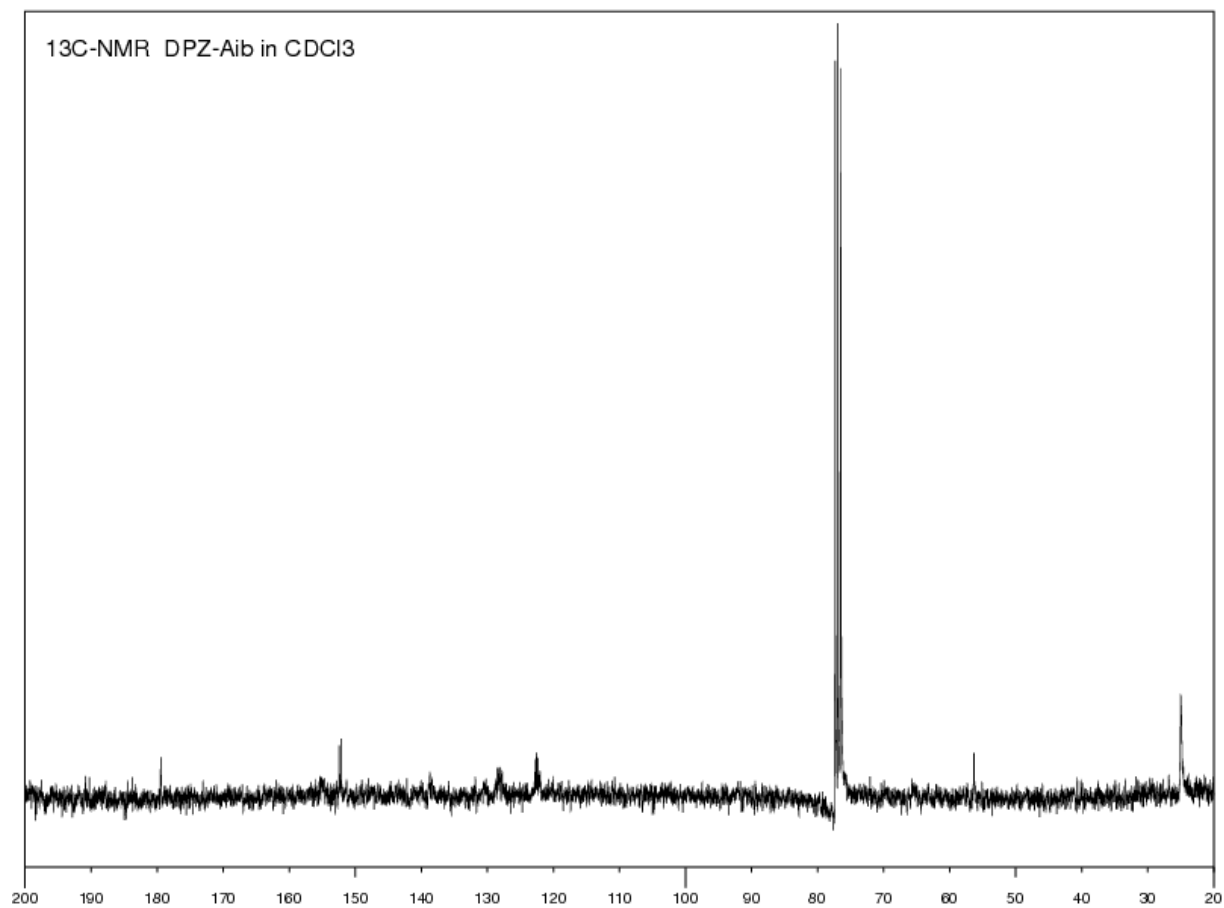

# Compound 5

DUAL\_1H\_no\_peak DMSO v pcinmr 30

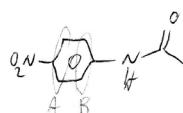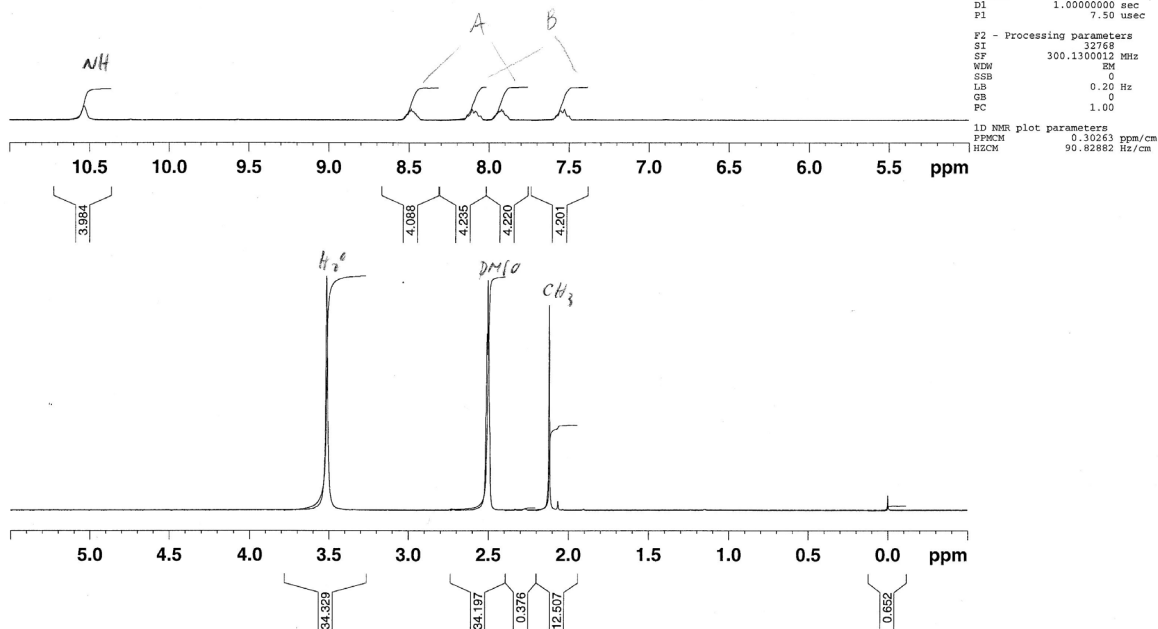

### Compound 6

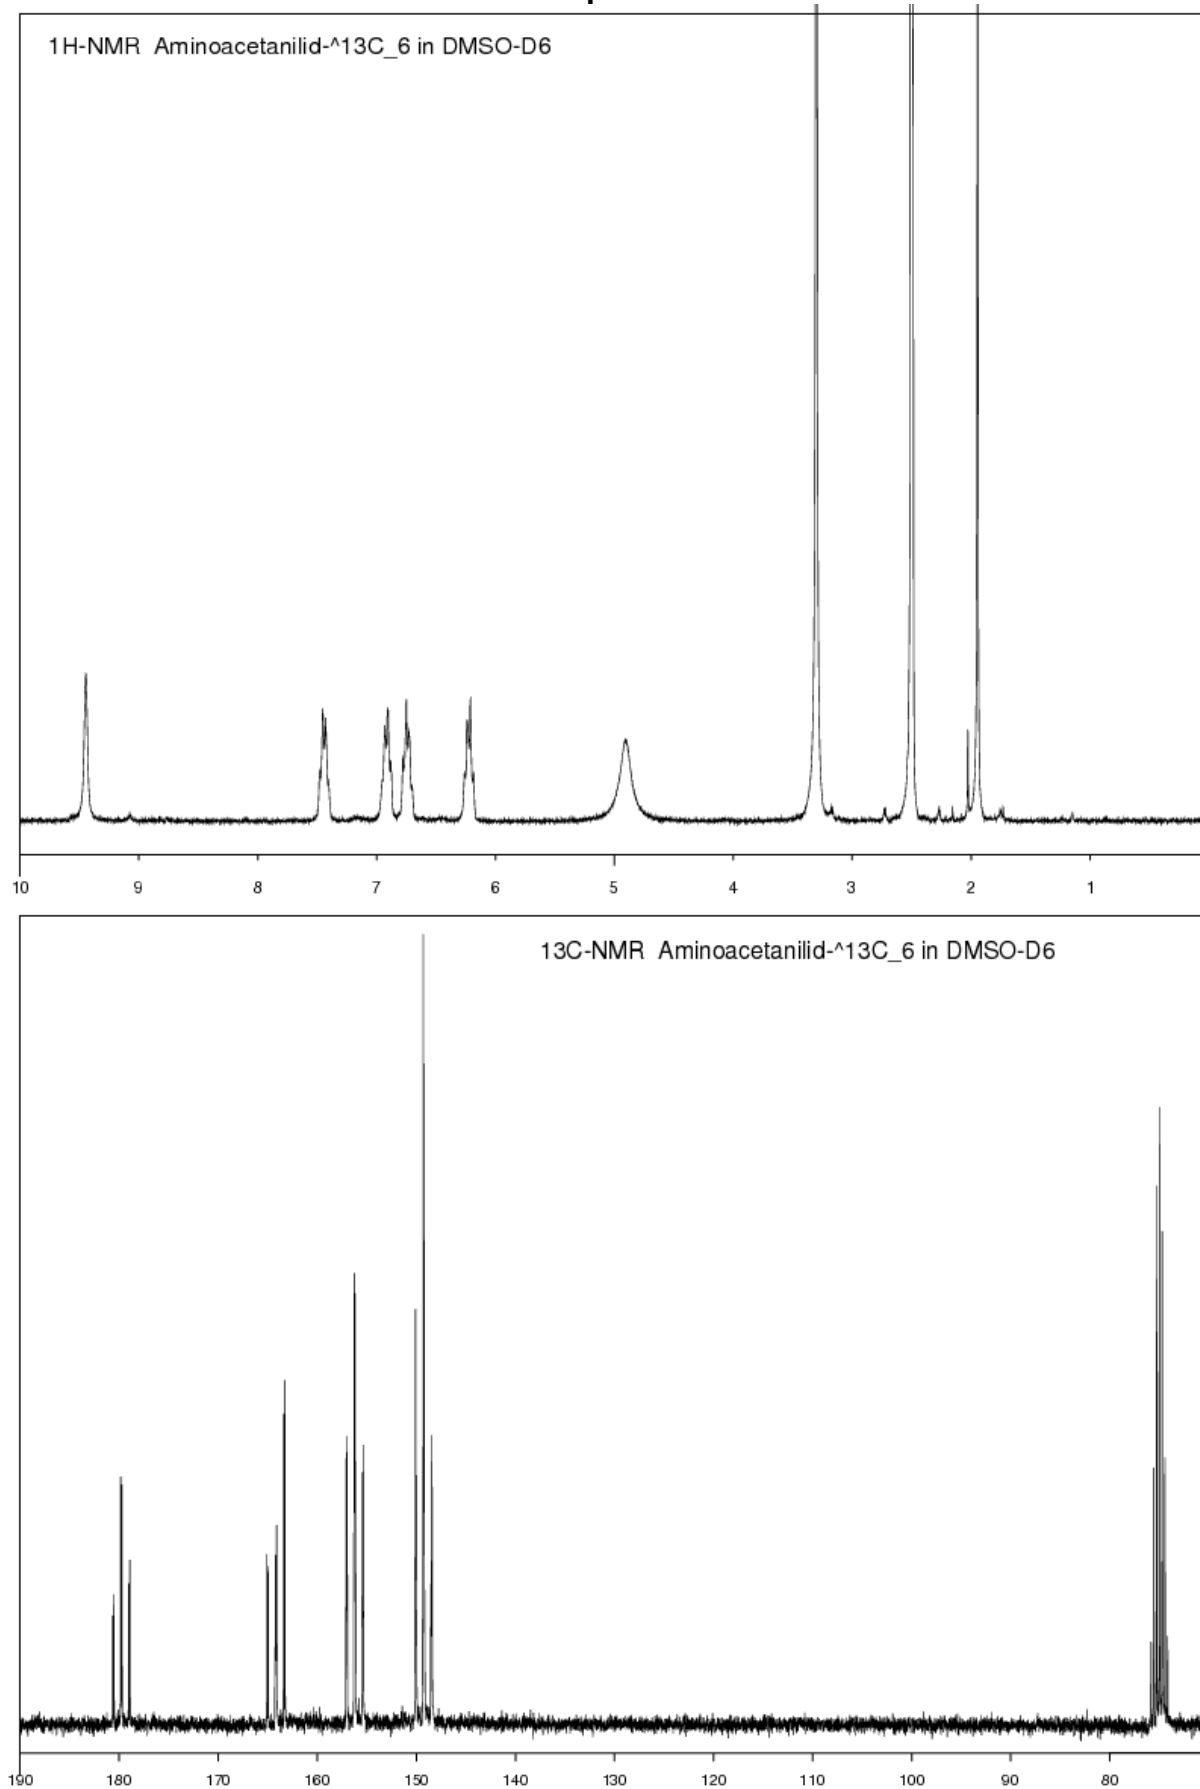

### Compound 8

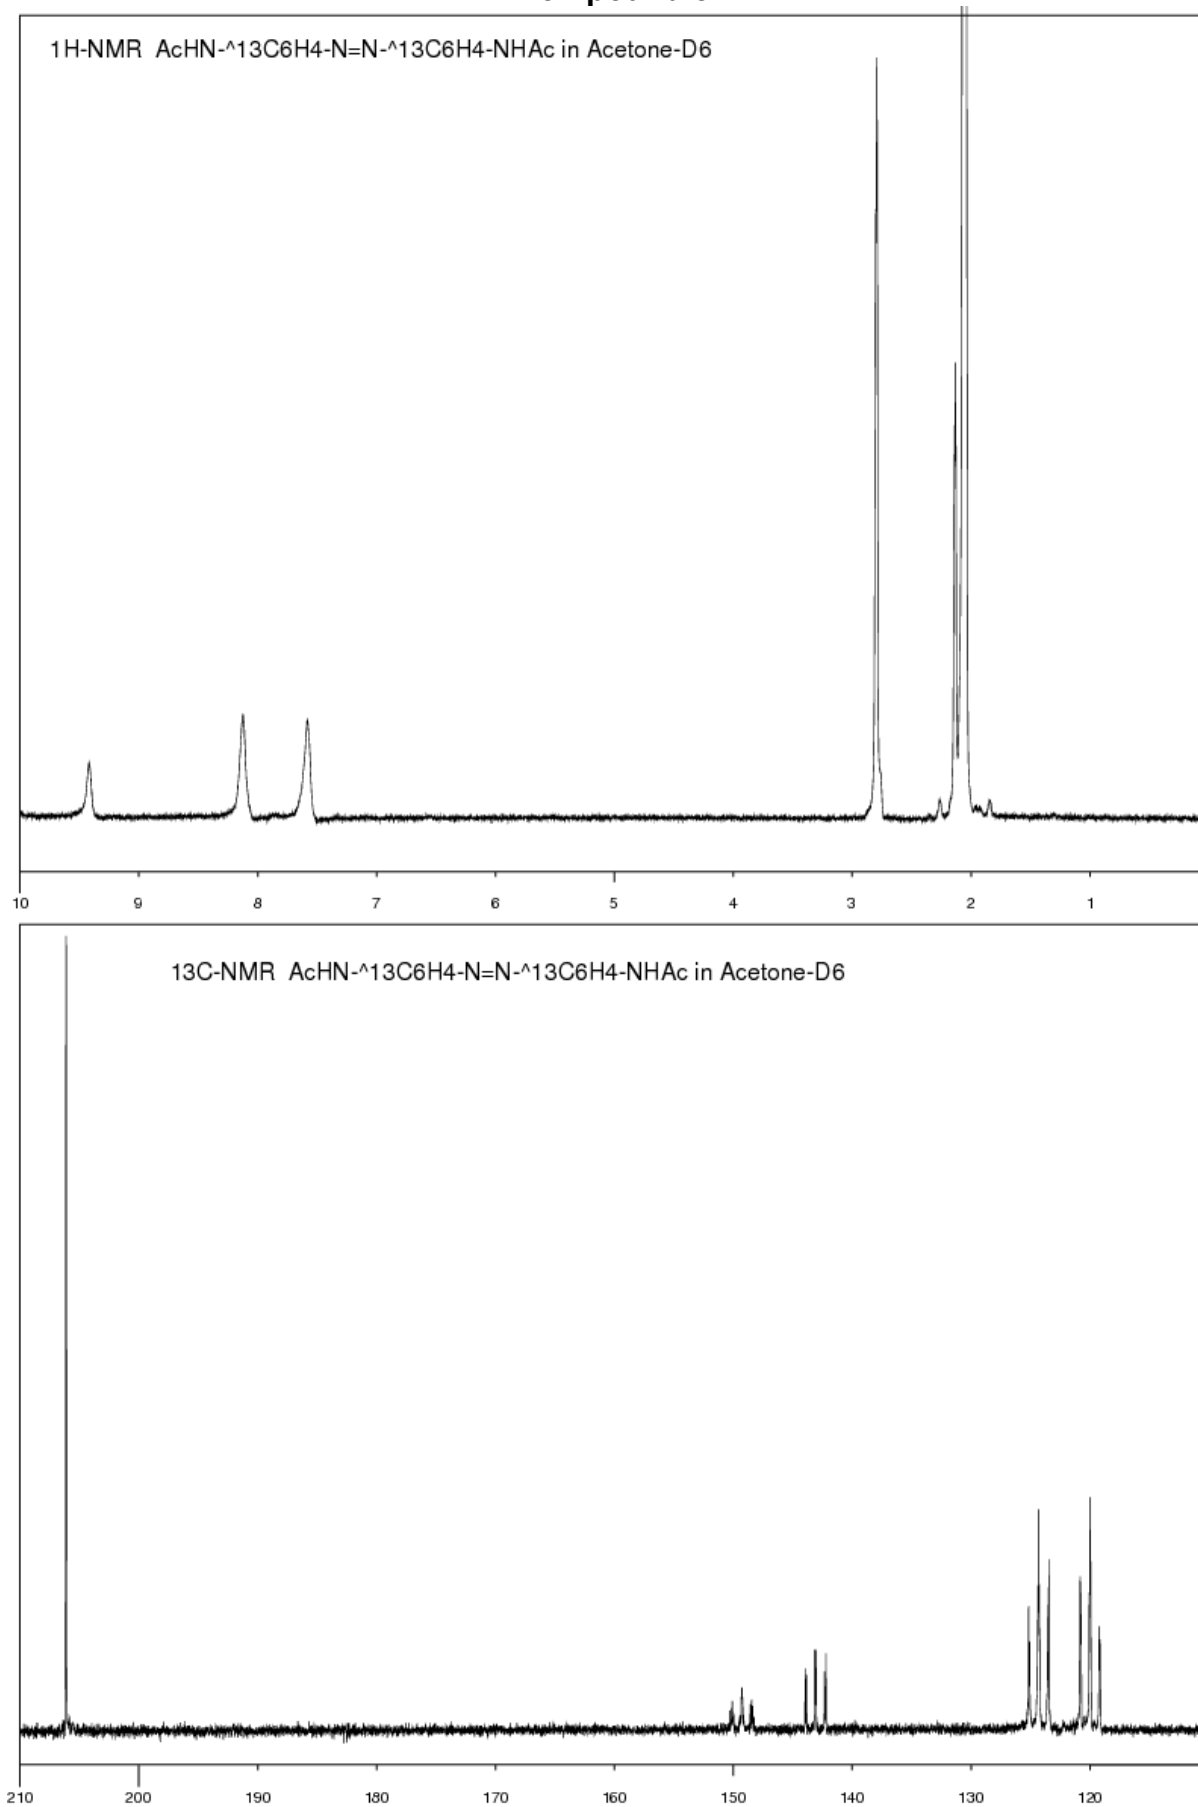



### Compound 9

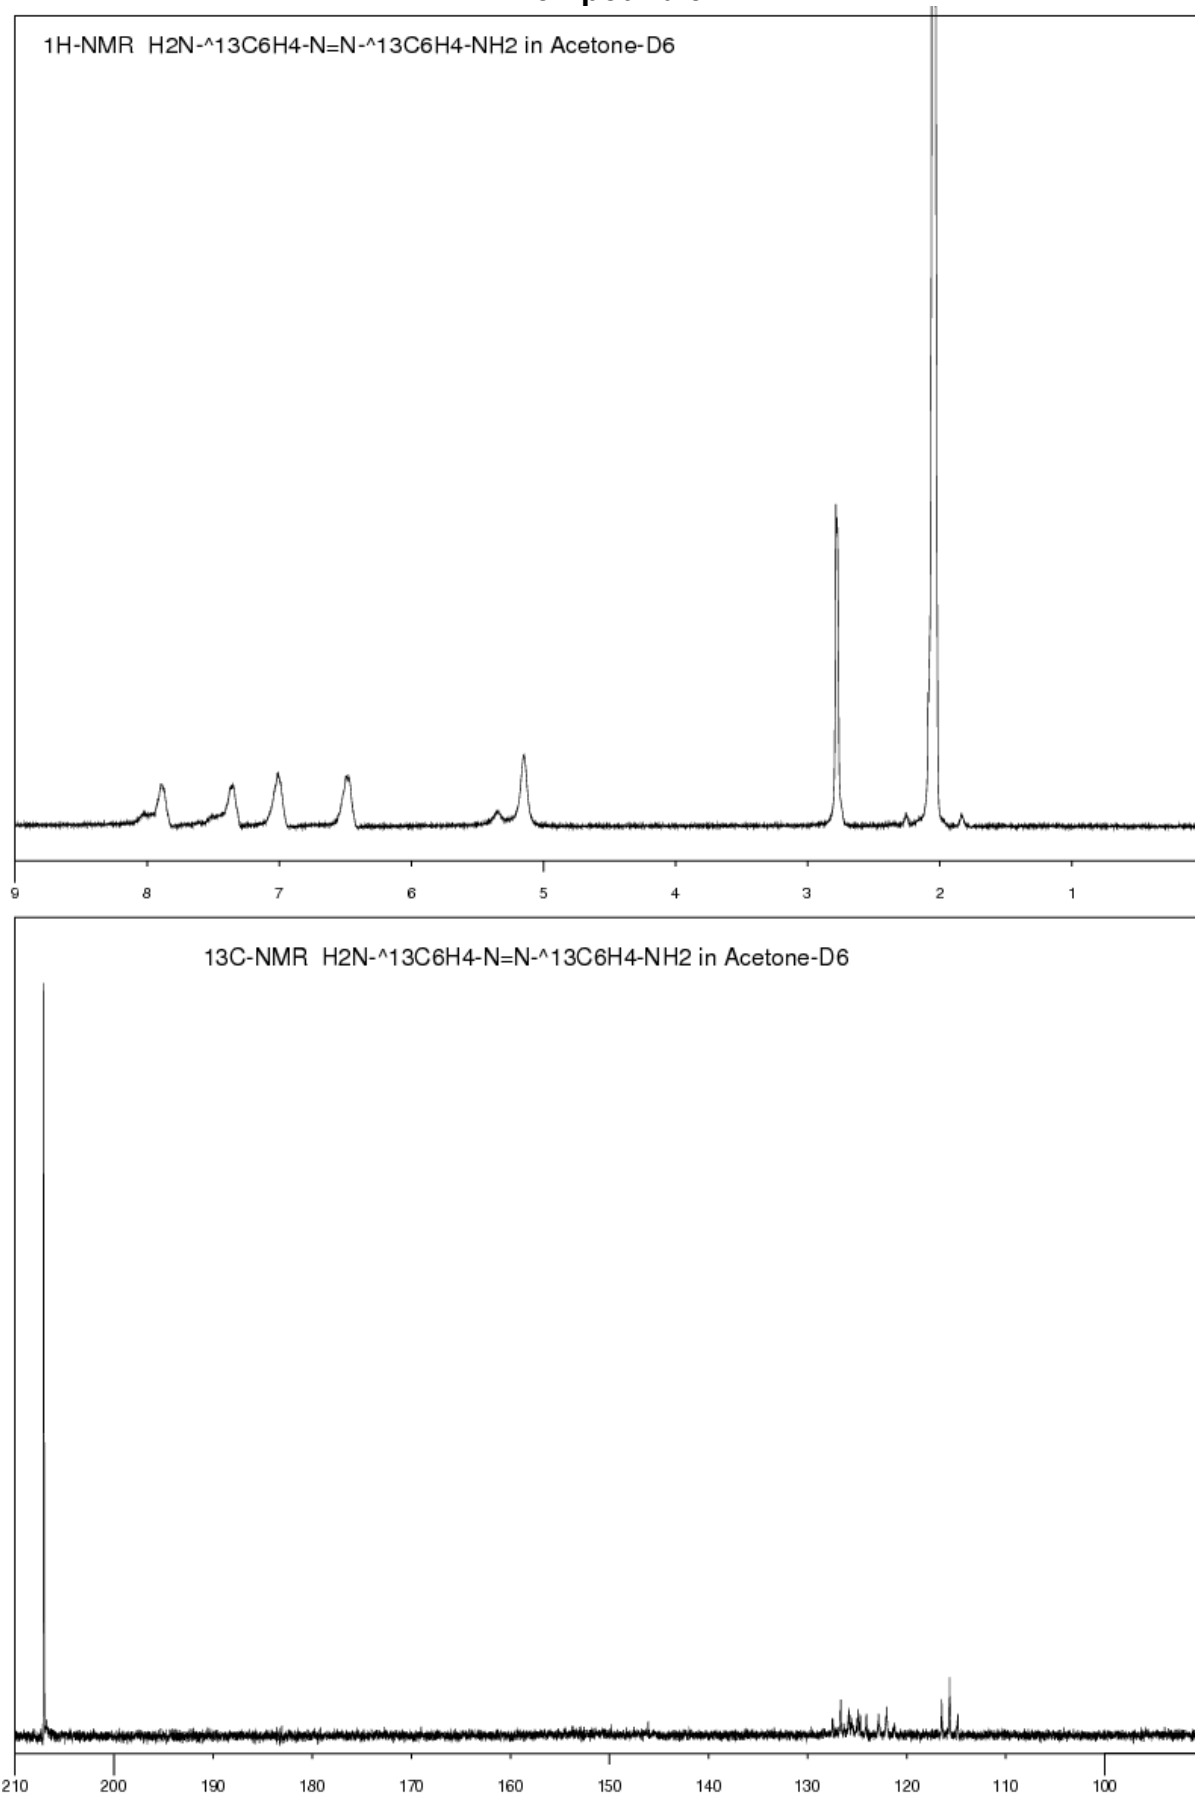

### Compound 12a

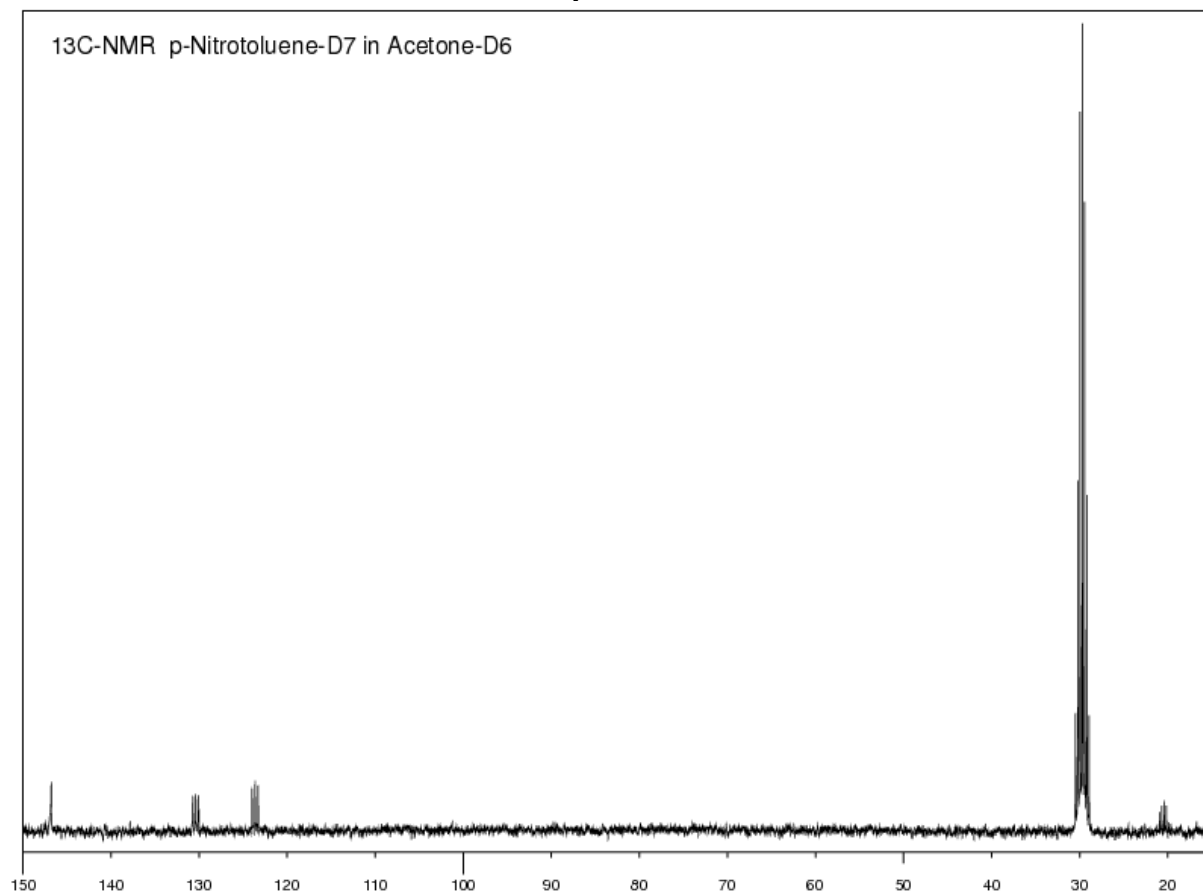

### Compound 12b

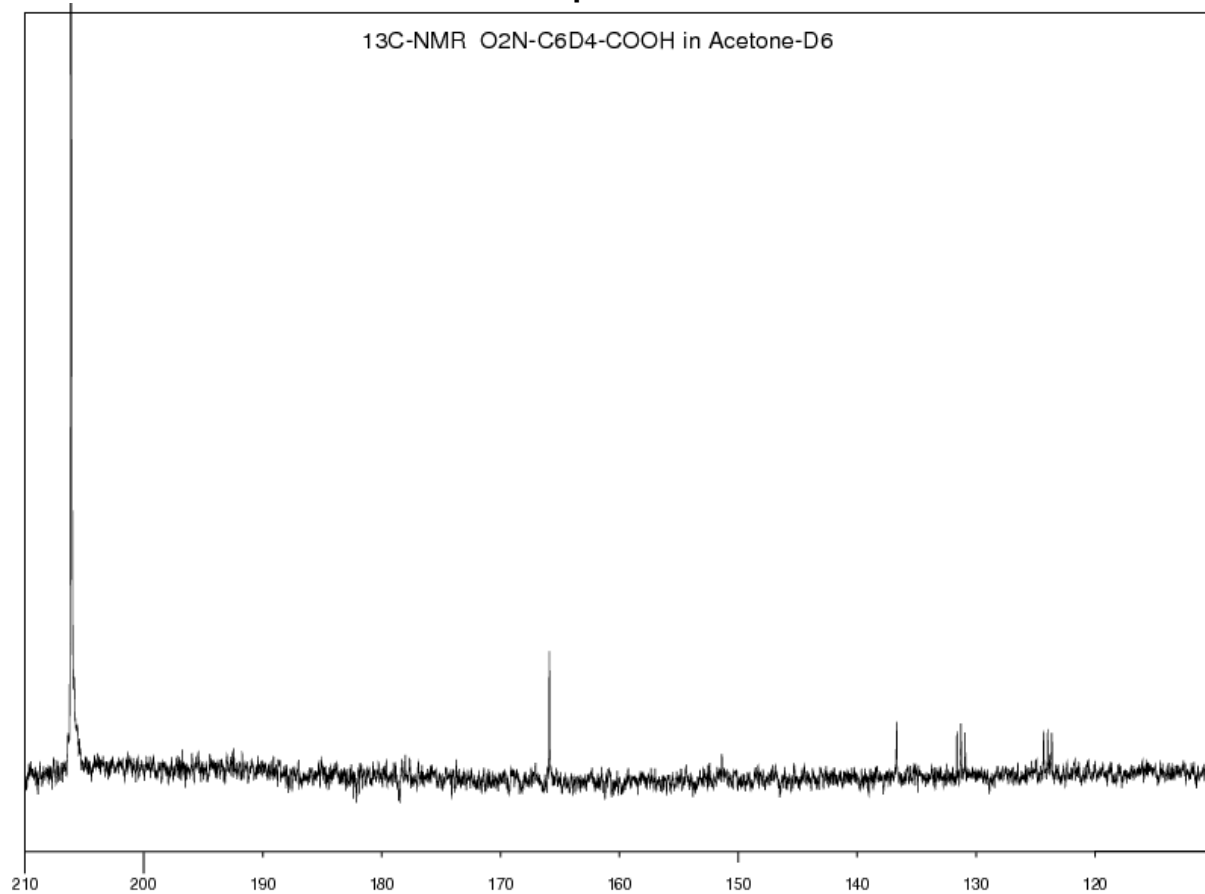

### Compound 12c

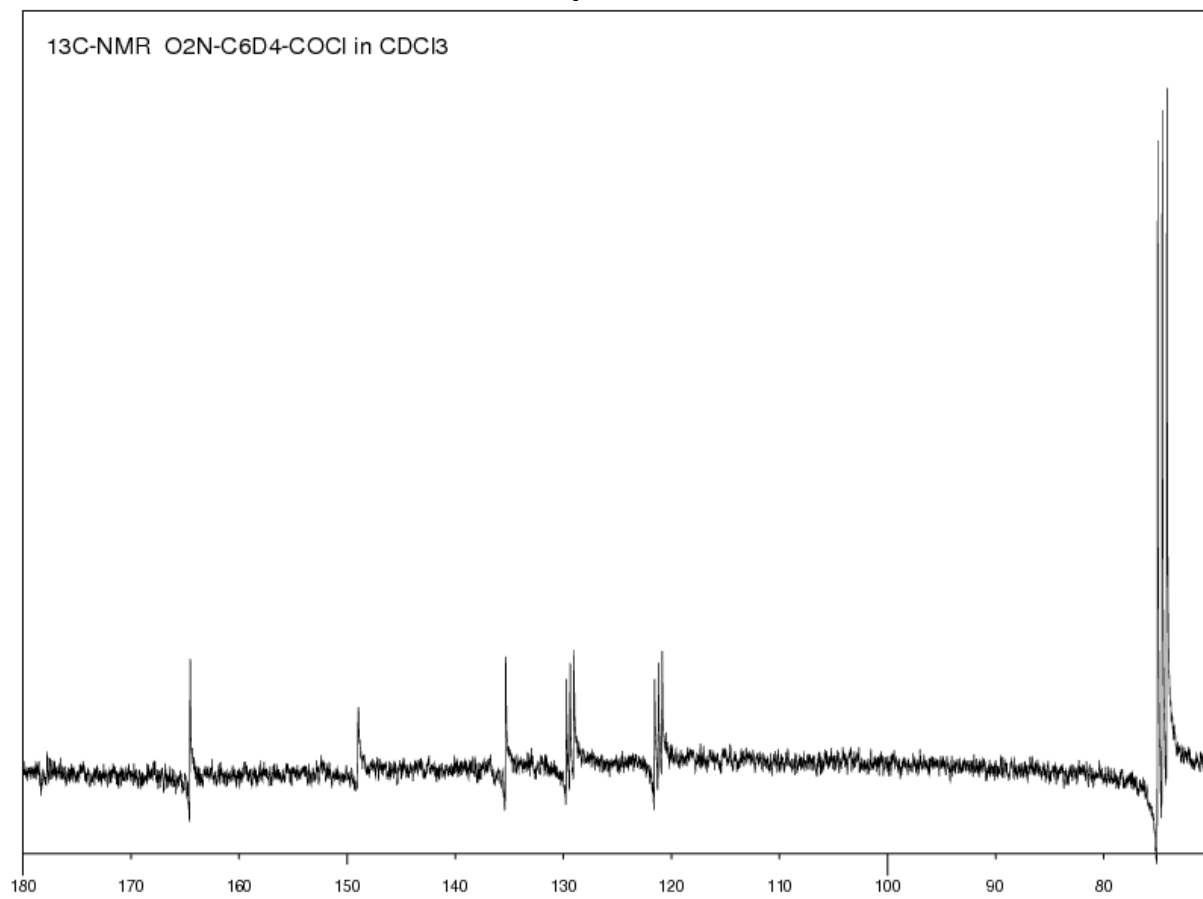

### Compound 12d

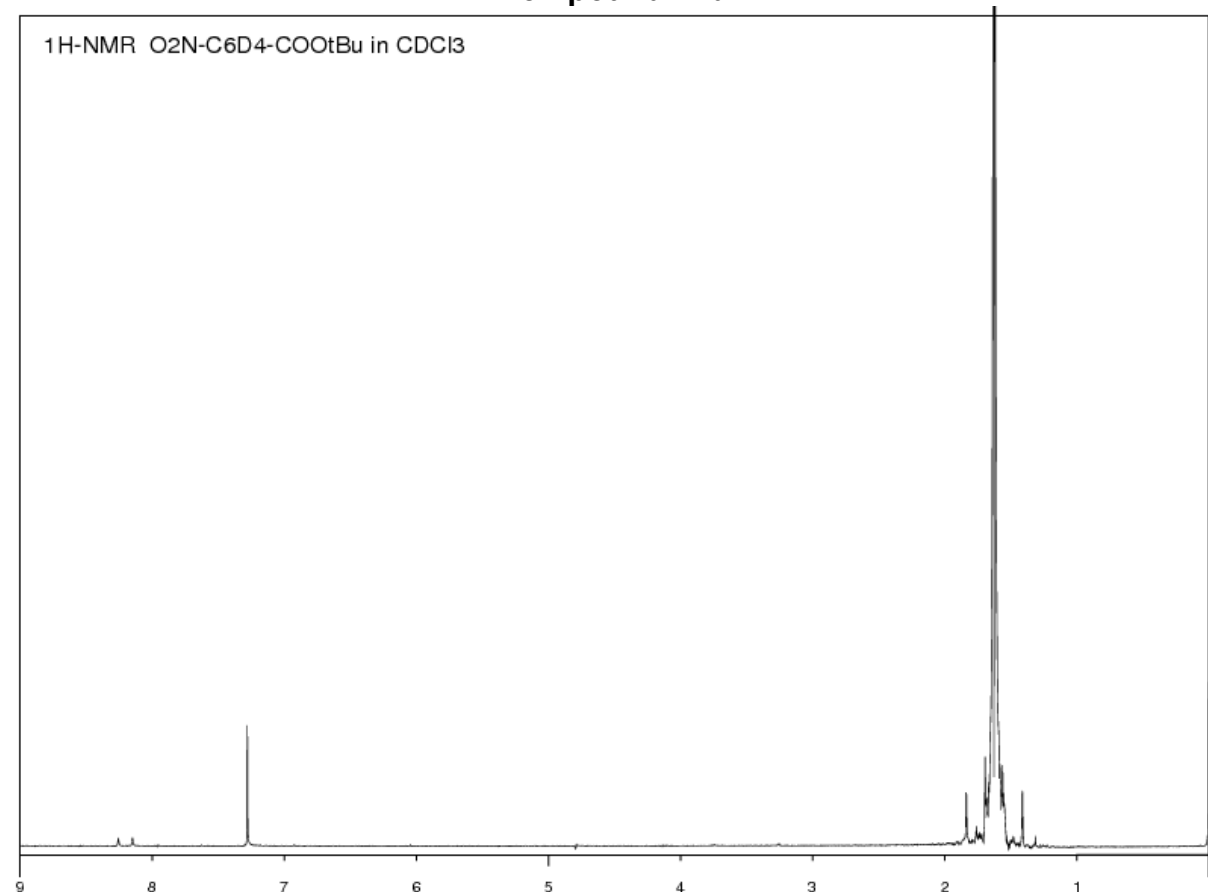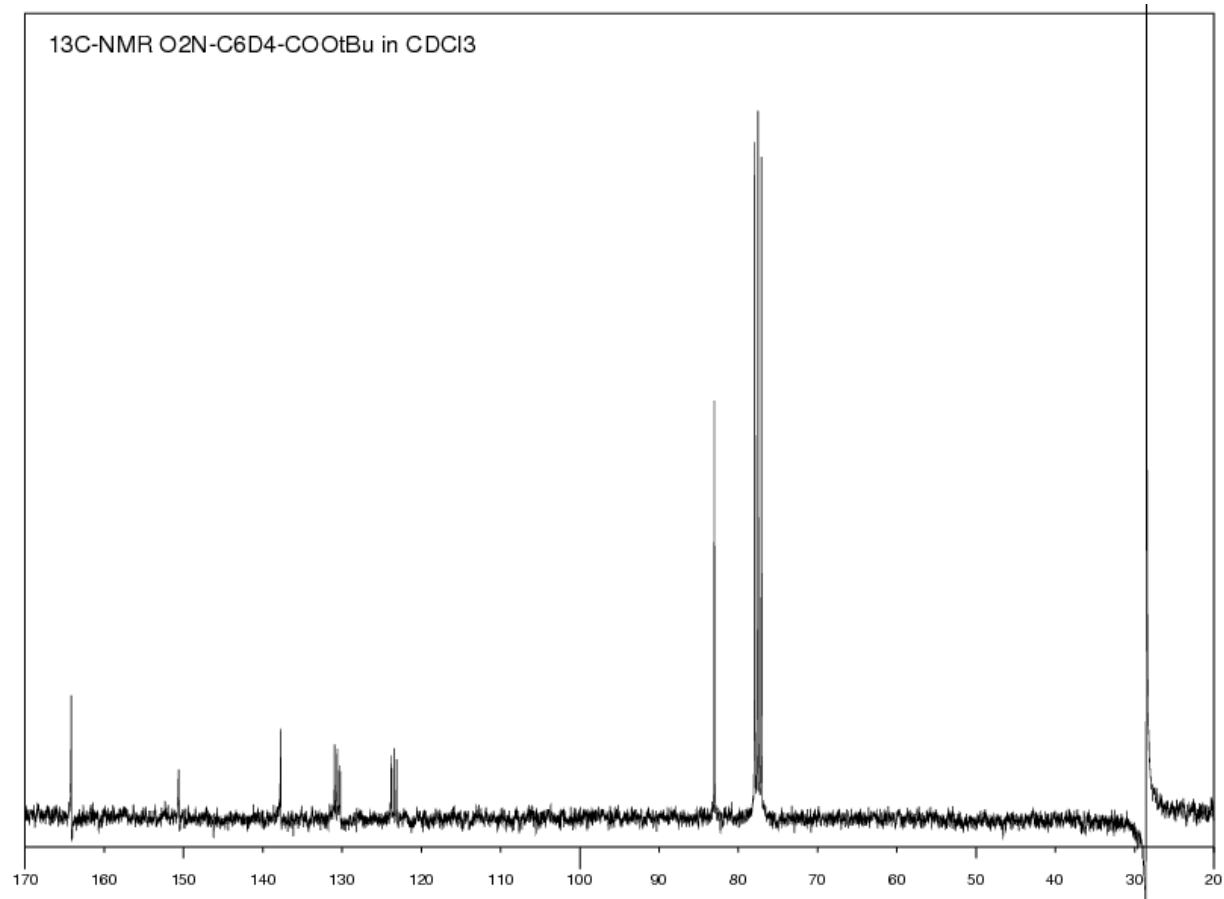

**Compound 12e**

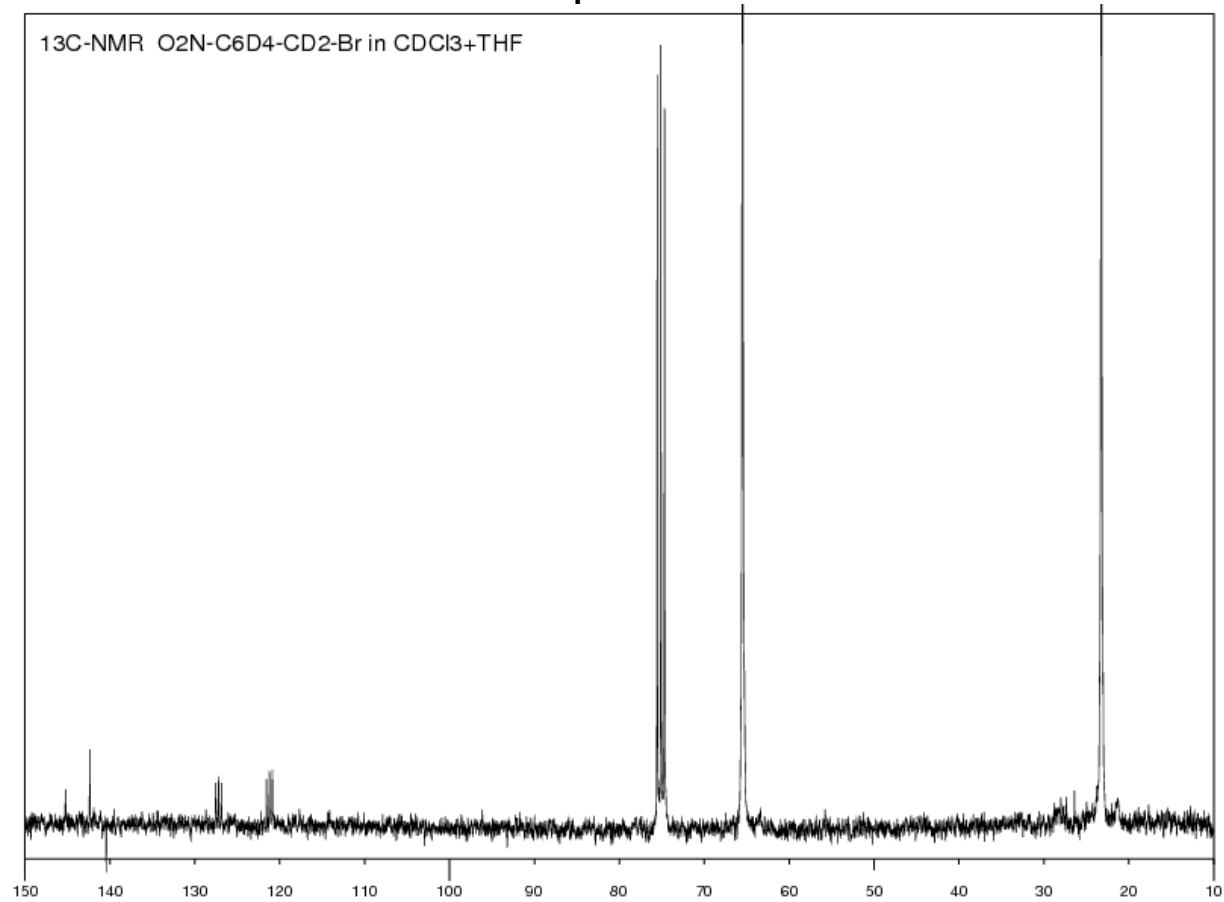

### Compound 12f

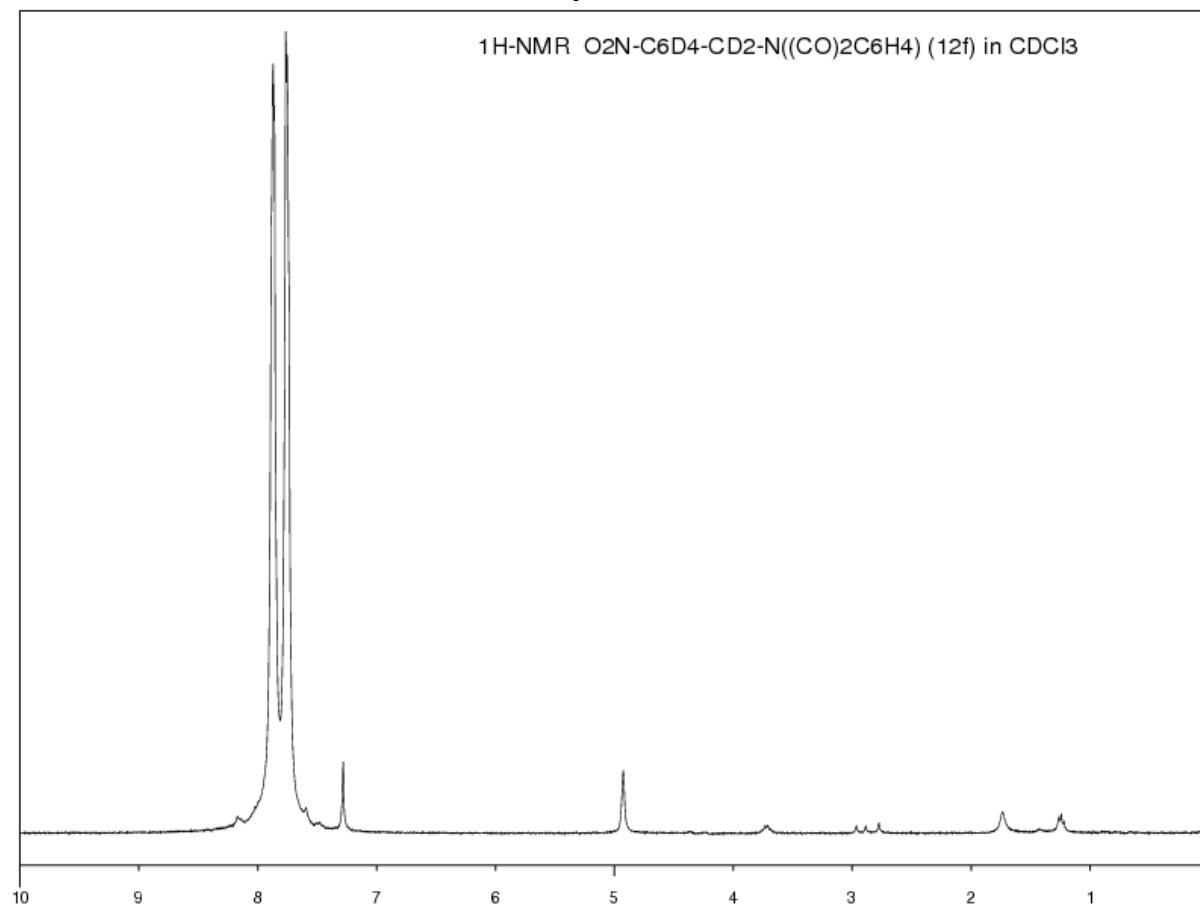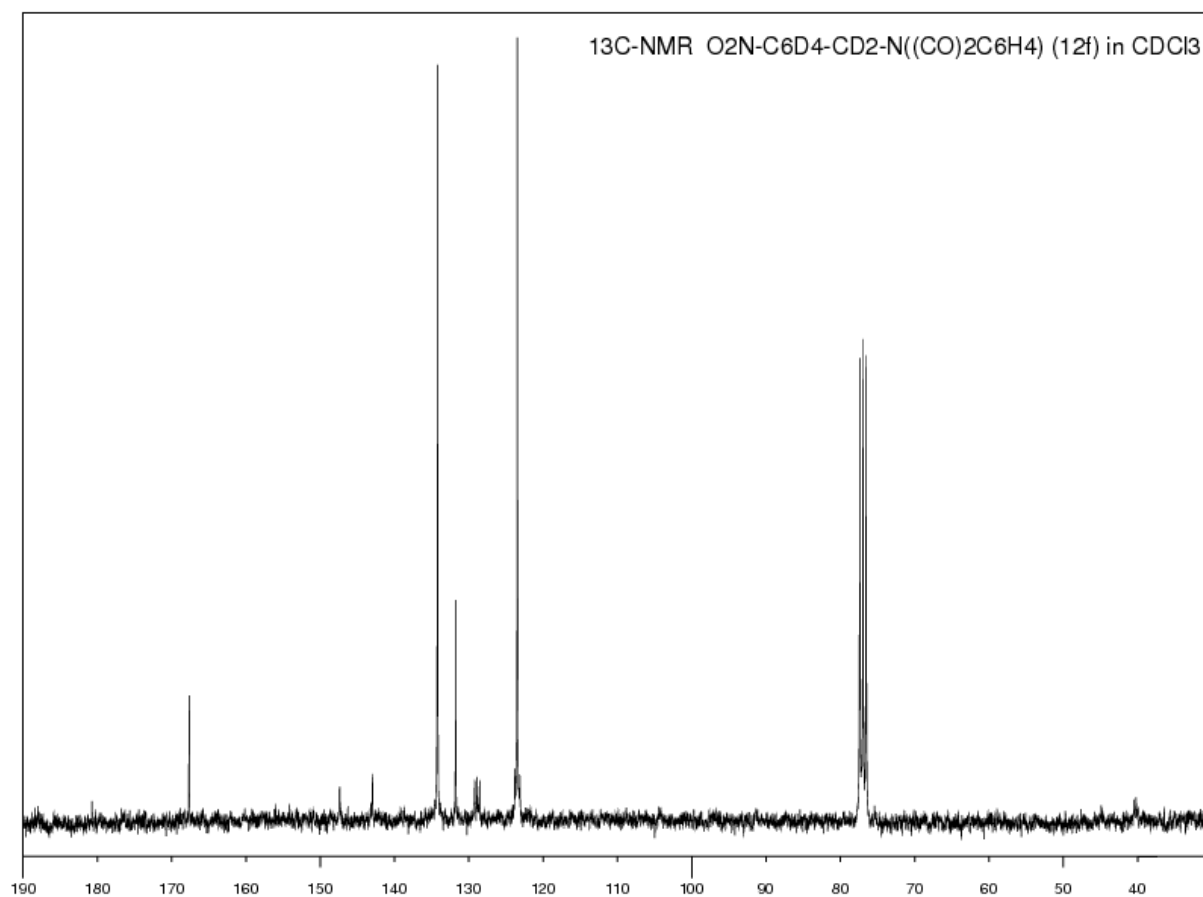

**Compound 12h**

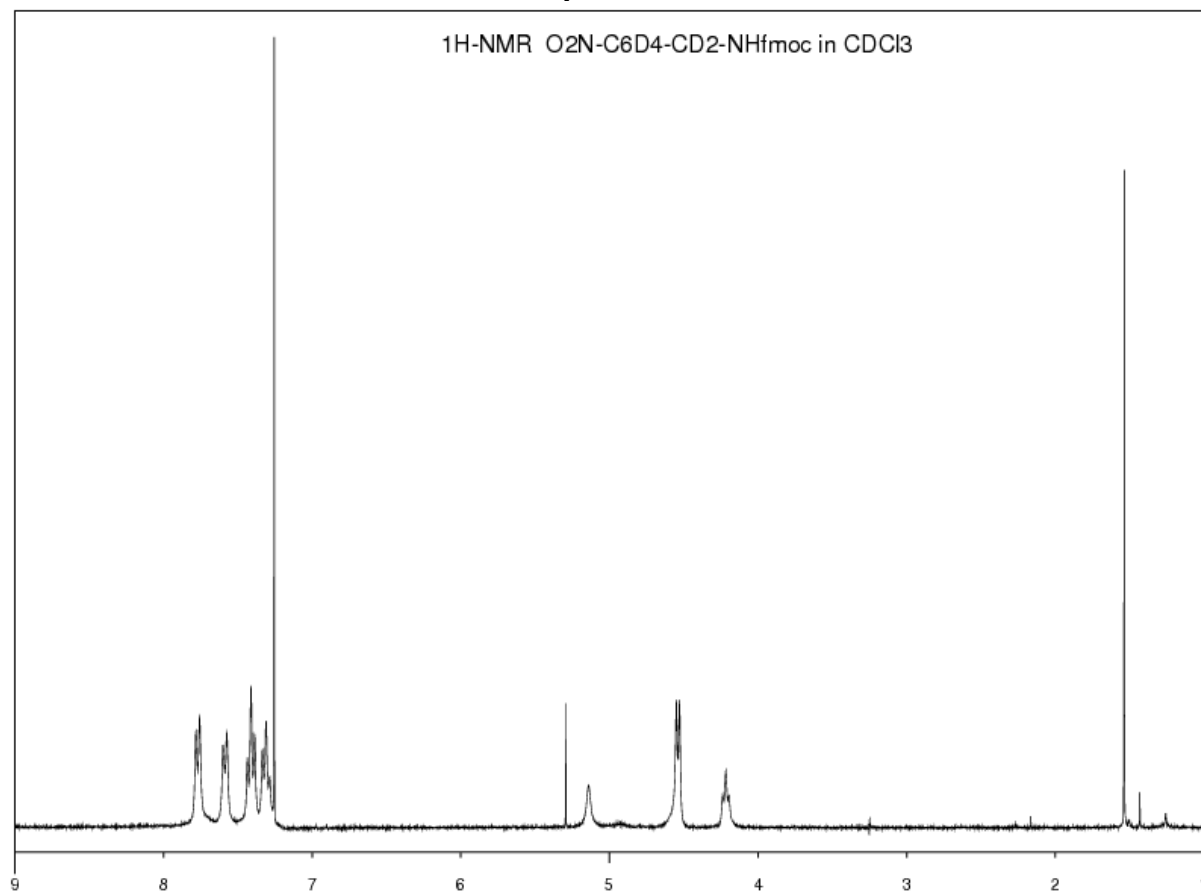

### Compound 13a

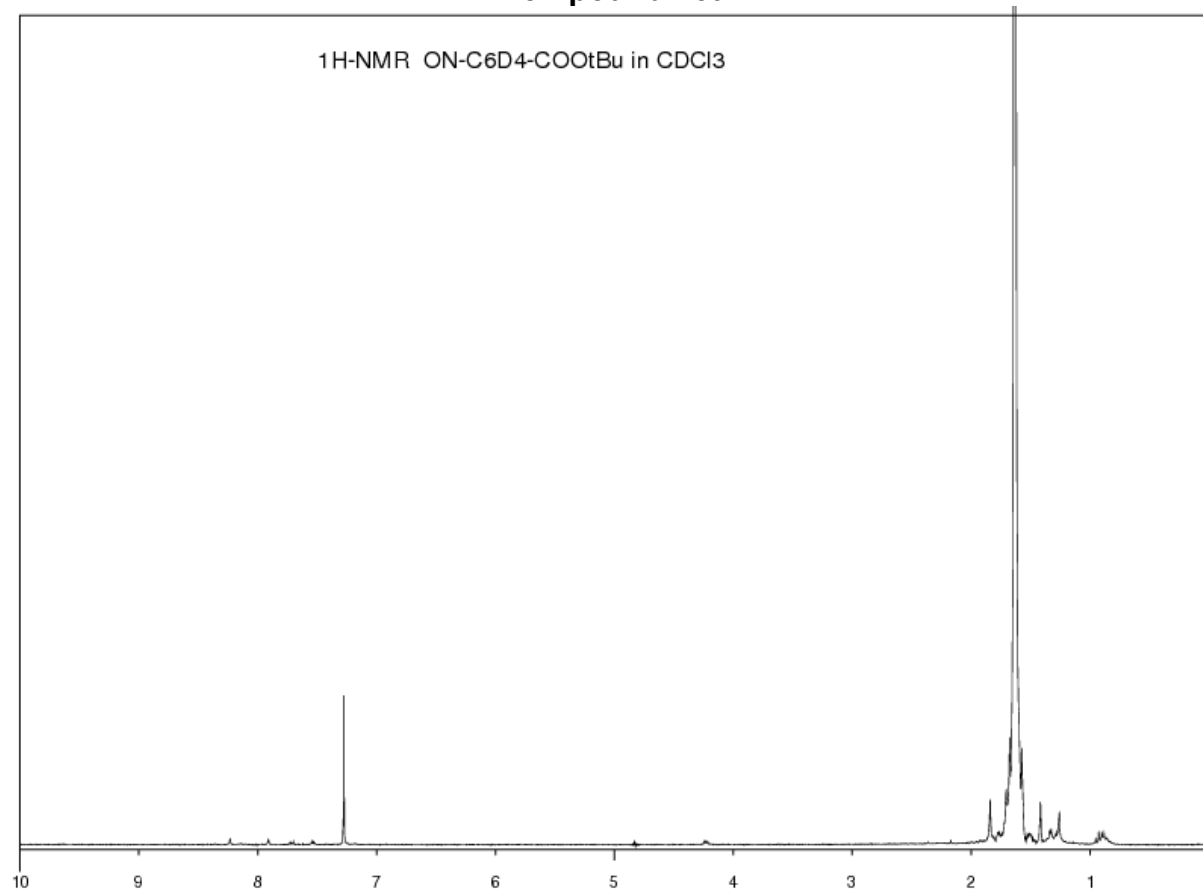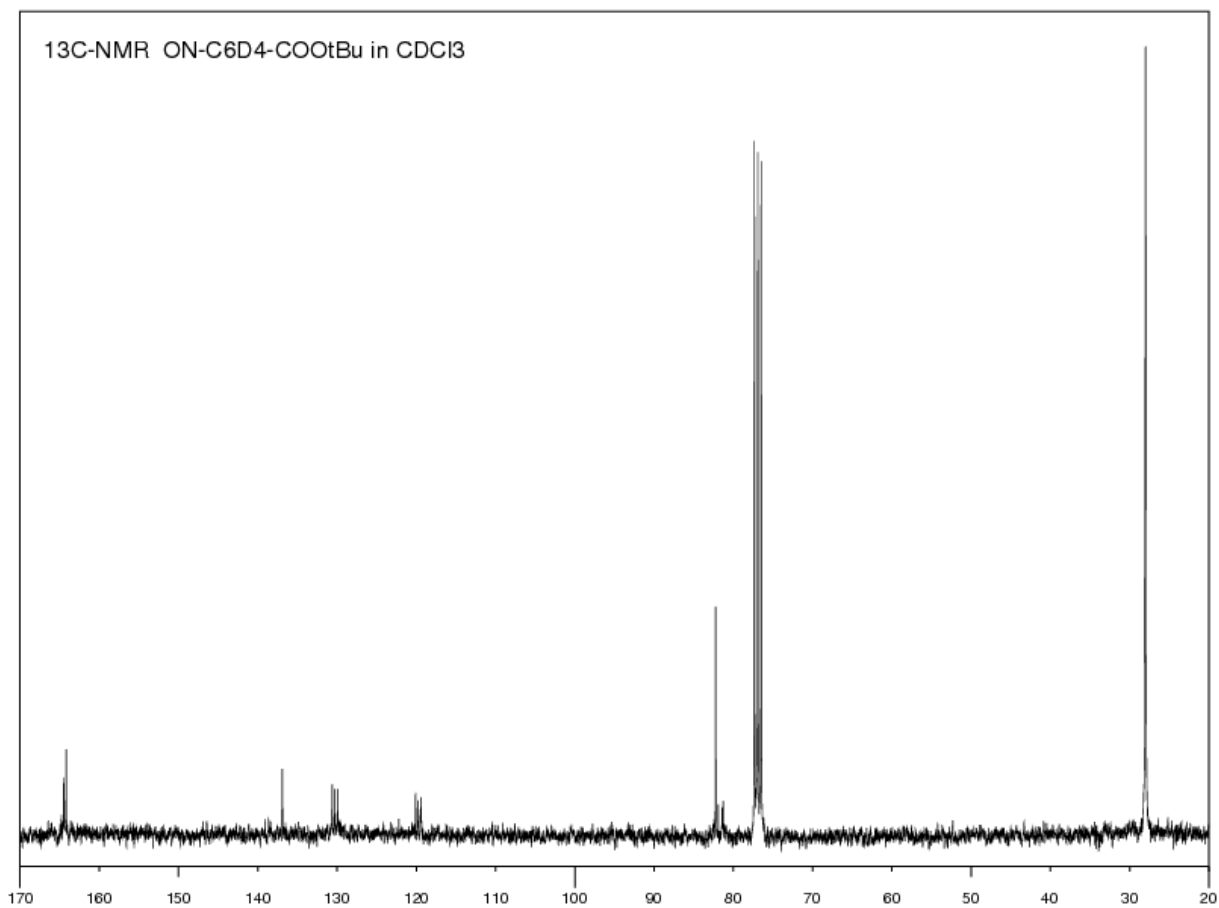



### Compound 13b

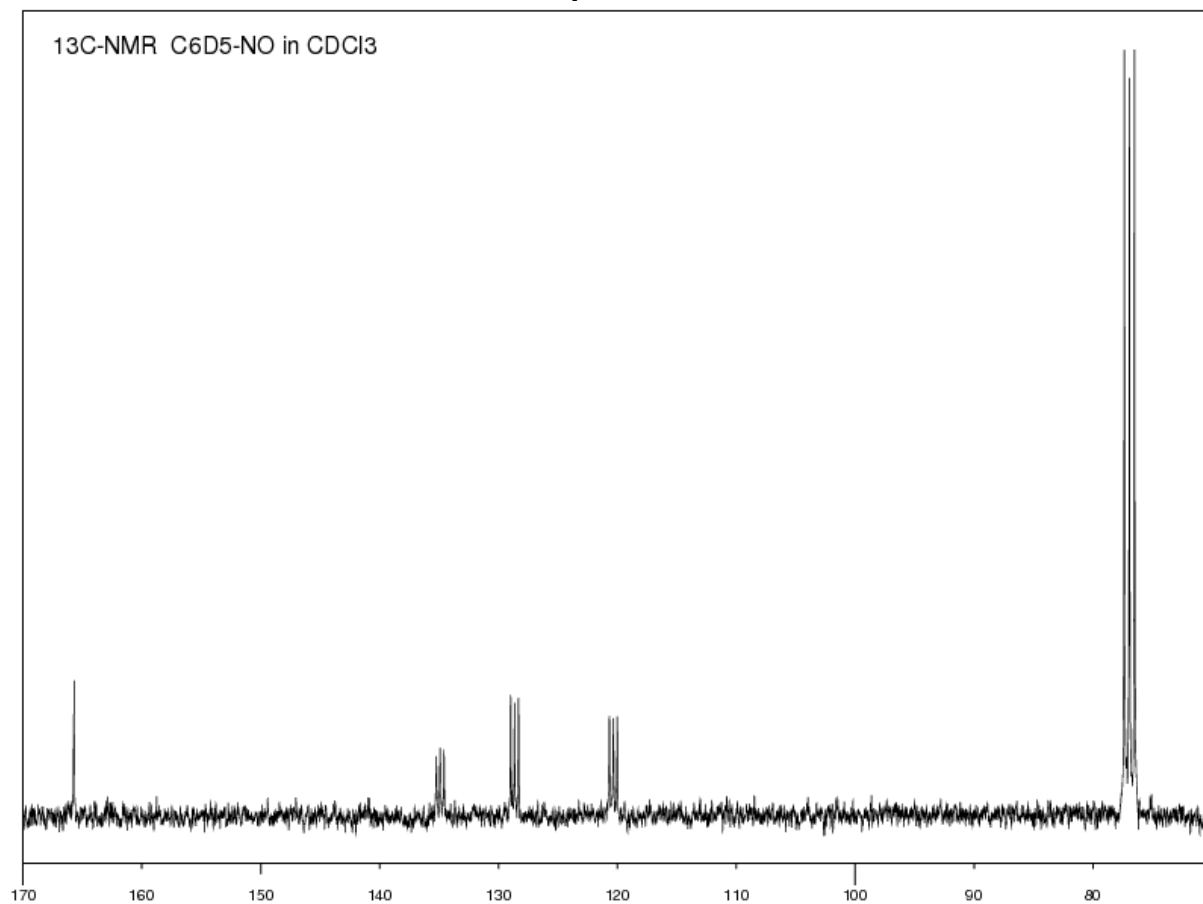

### Compound 14a

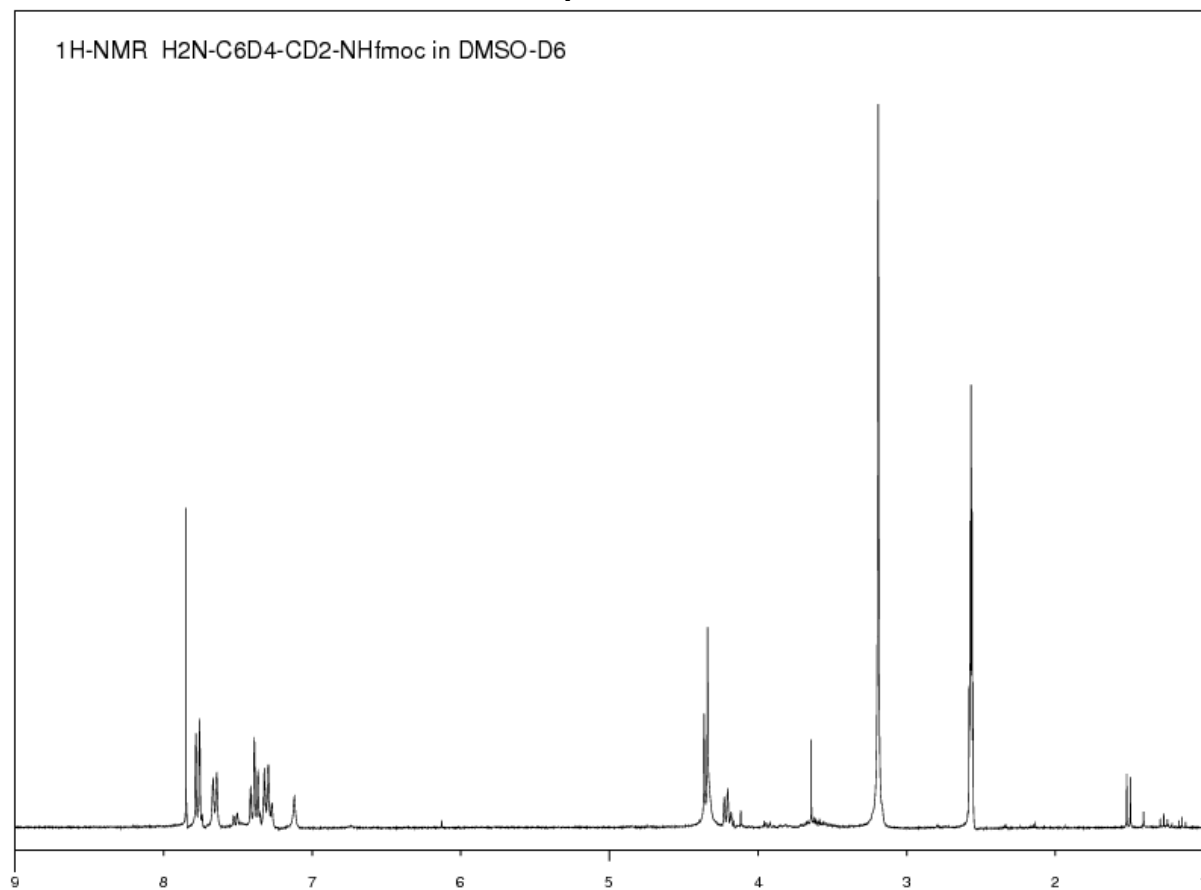

### Compound 14b

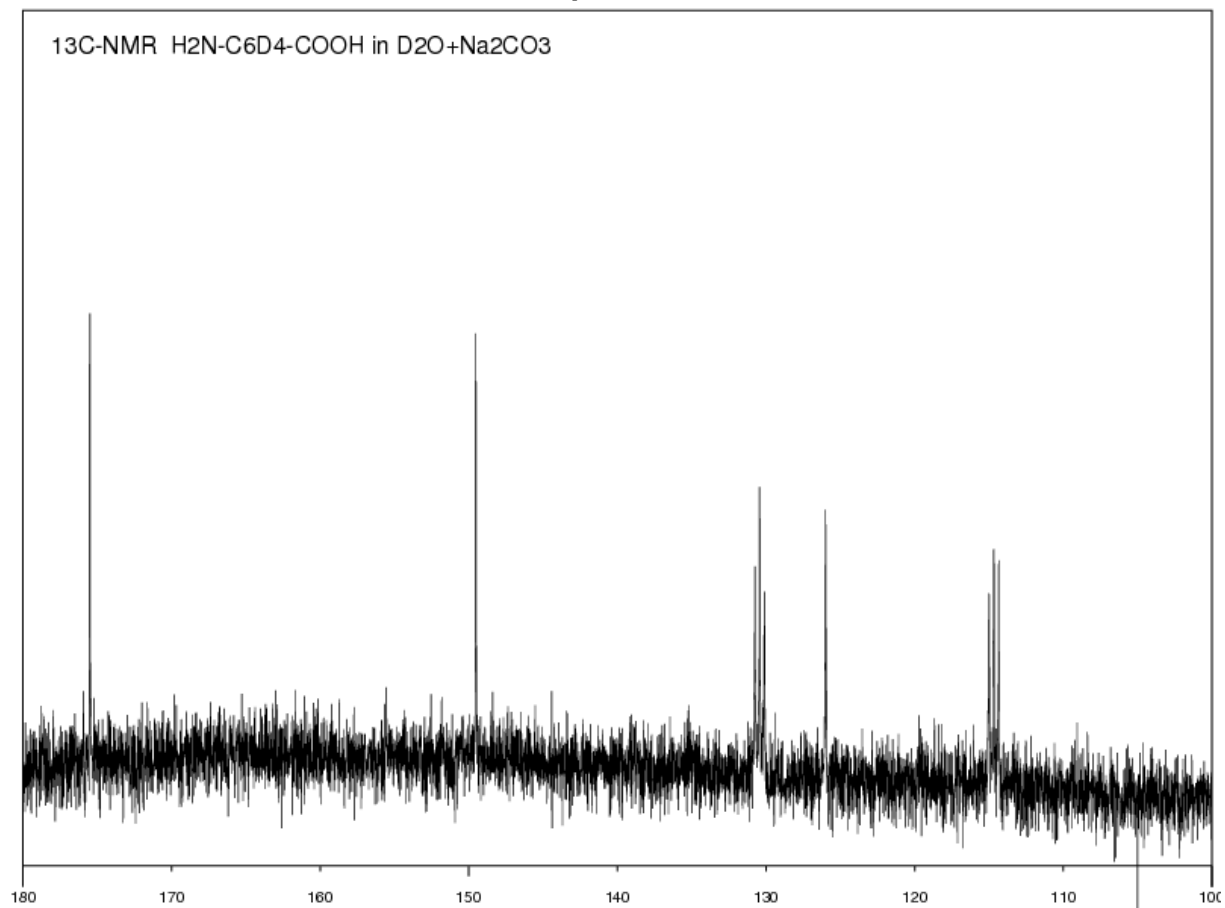

### Compound 14c

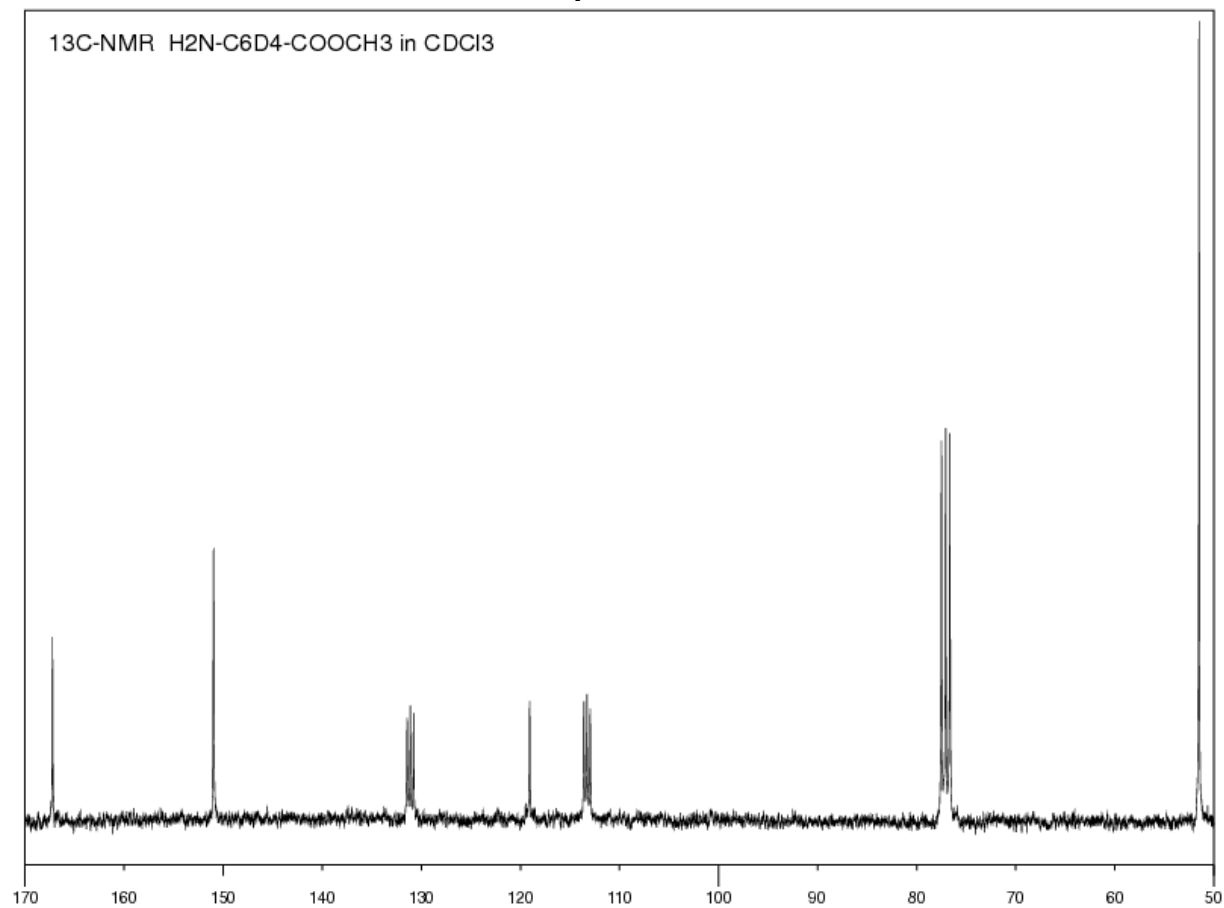

### Compound 14d

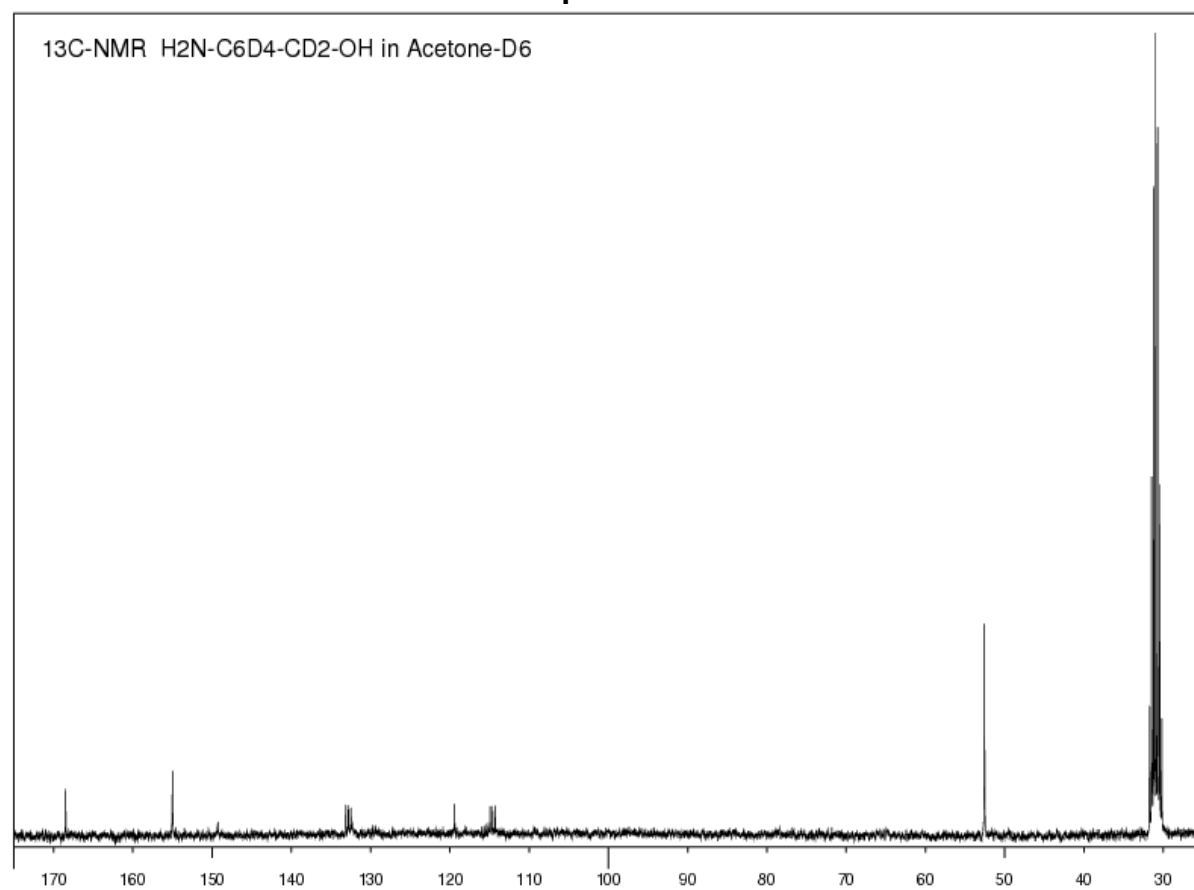

### Compound 15a

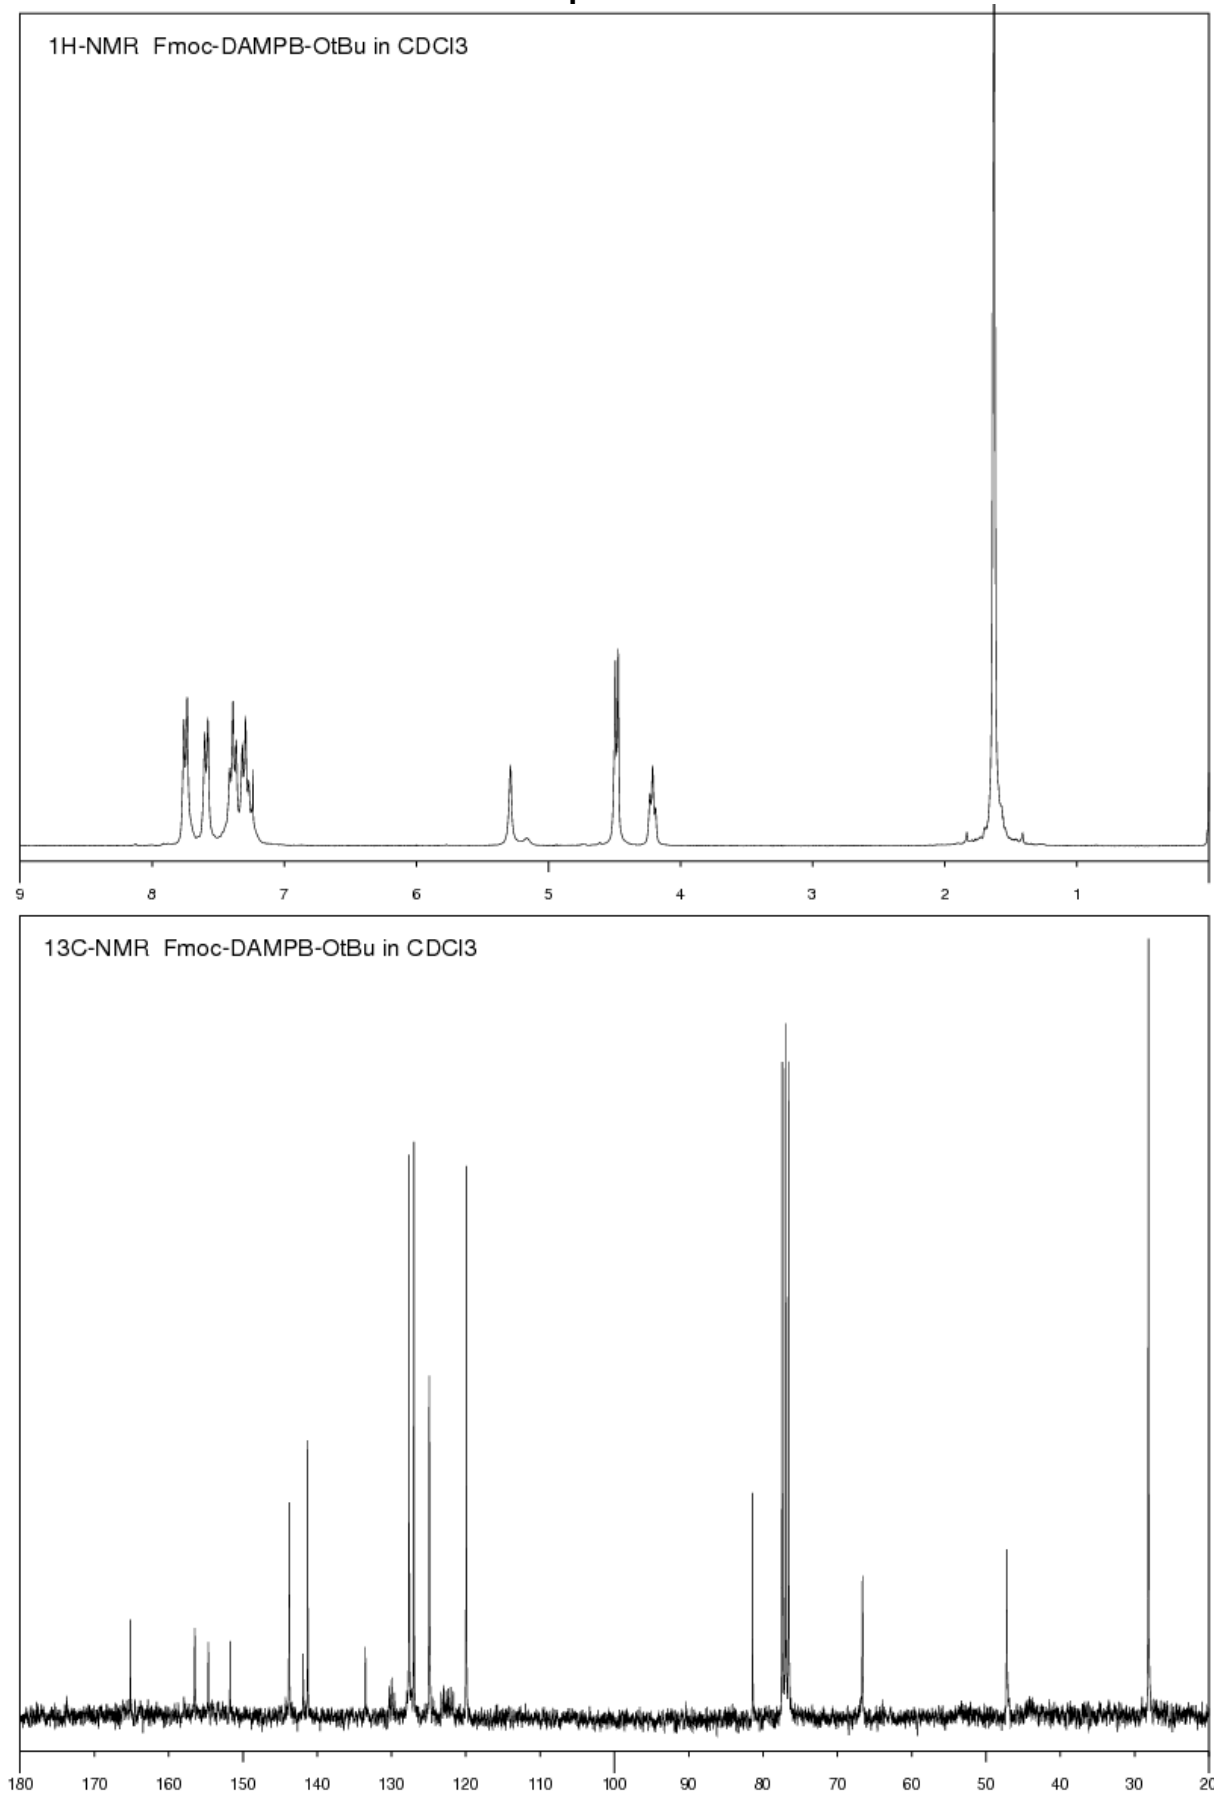

### Compound 15b

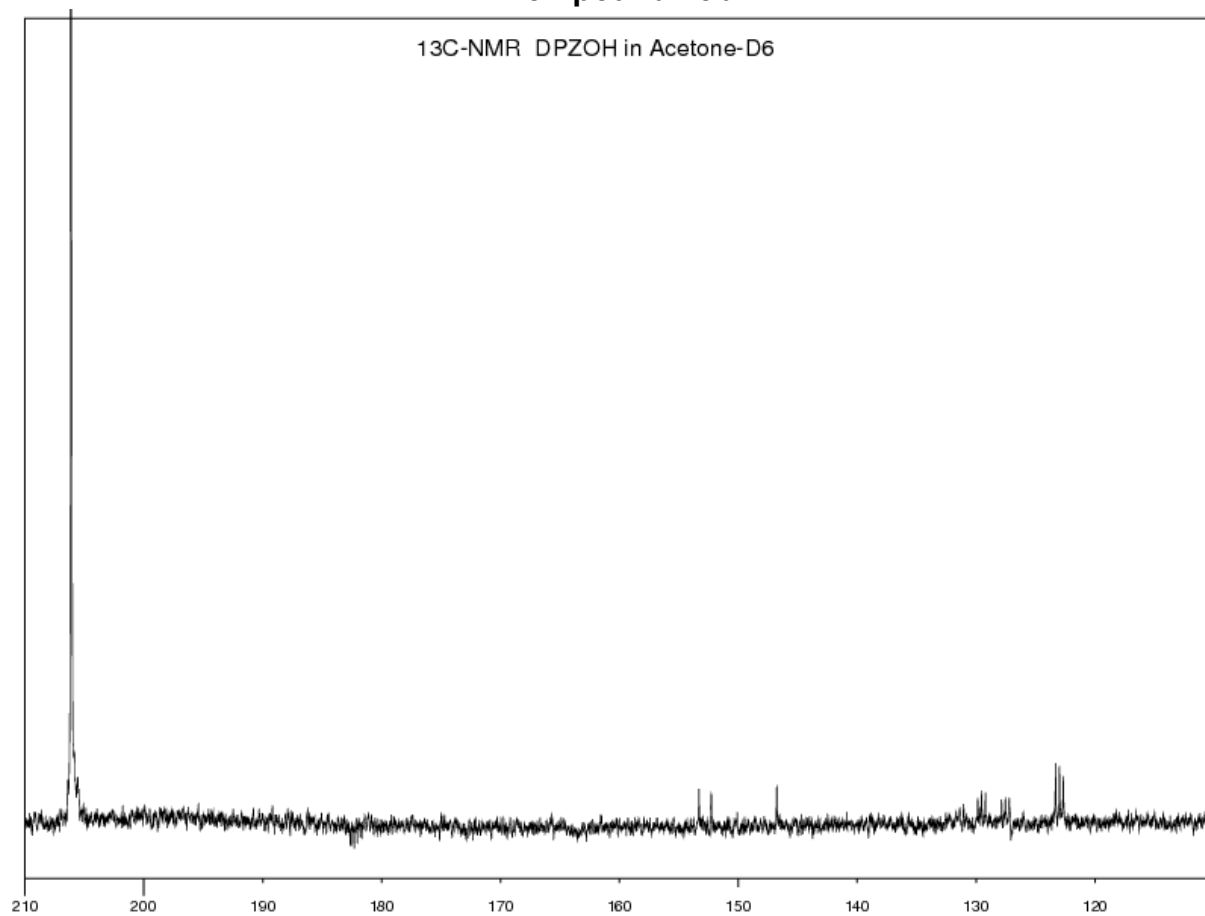

Supplement: b804568b.pdf [file b804568b.pdf]
